# Supplementary material for: Characterization of vegetative inflorescence (mc-vin) mutant provides new insight into the role of MACROCALYX in regulating inflorescence development of tomato
Source: PubMed Central journal article supplement (PMC4698712; doi:10.1038/srep18796), 2016-01-04
Supplement: srep18796-s1.pdf [file srep18796-s1.pdf]

**Characterization of *vegetative inflorescence (mc-vin)* mutant provides new insight into the role of *MACROCALYX* in regulating inflorescence development of tomato**

Fernando J. Yuste-Lisbona<sup>1,+</sup>, Muriel Quinet<sup>1,+,#</sup>, Antonia Fernández-Lozano<sup>1</sup>, Benito Pineda<sup>2</sup>, Vicente Moreno<sup>2</sup>, Trinidad Angosto<sup>1</sup>, Rafael Lozano<sup>1,\*</sup>

<sup>1</sup> Centro de Investigación en Biotecnología Agroalimentaria (BITAL), Universidad de Almería, 04120 Almería, Spain.

<sup>2</sup> Instituto de Biología Molecular y Celular de Plantas (UPV-CSIC), Universidad Politécnica de Valencia. Avenida de los Naranjos s/n. 46022 Valencia, Spain

<sup>#</sup> Present address: Groupe de Recherche en Physiologie végétale, Earth and Life Institute, Université catholique de Louvain, Croix du Sud 4-5 bte L7.07.13, B-1348 Louvain-la-Neuve, Belgium

<sup>+</sup> These authors contributed equally to this work

<sup>\*</sup> Corresponding author: rlozano@ual.es

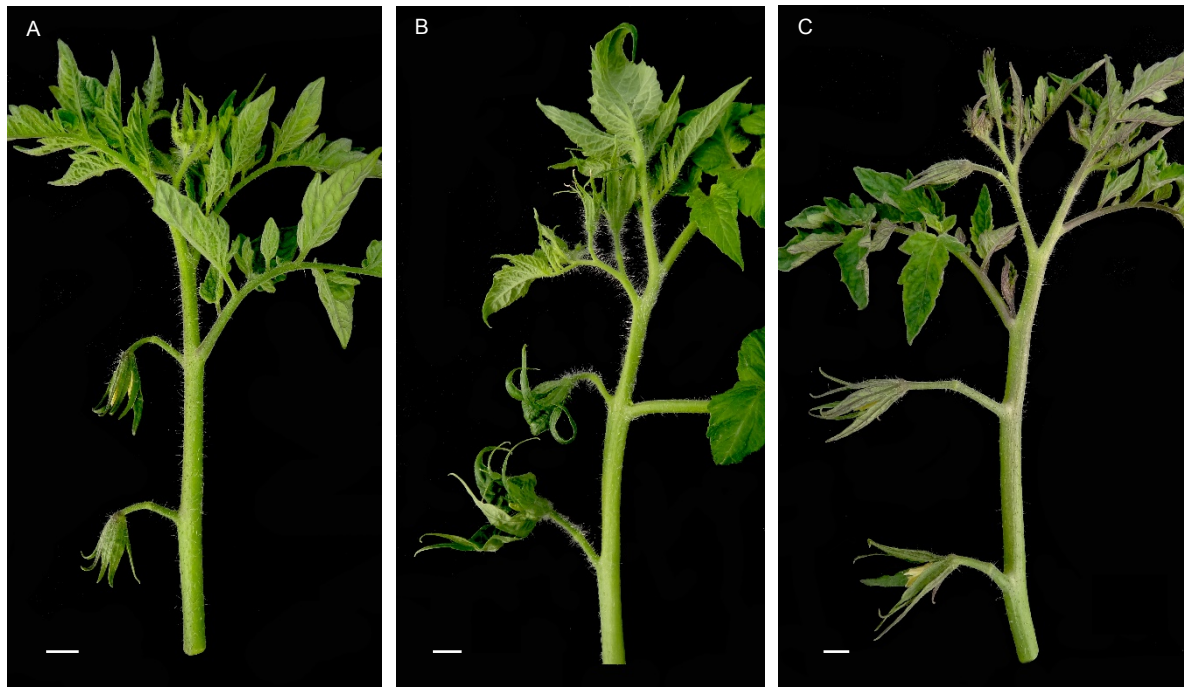

**Supplementary Figure S1.** Complementation test between *mc-vin* and *mc* (accession number LA2460) mutant plants. Complementation test was carried out by crossing a *mc-vin* mutant as female parent (A) with a *mc* mutant plant (B). All of the F1 plants produced reverted inflorescences and flowers with leafy-like sepals (C). Scale bars: 1 cm.

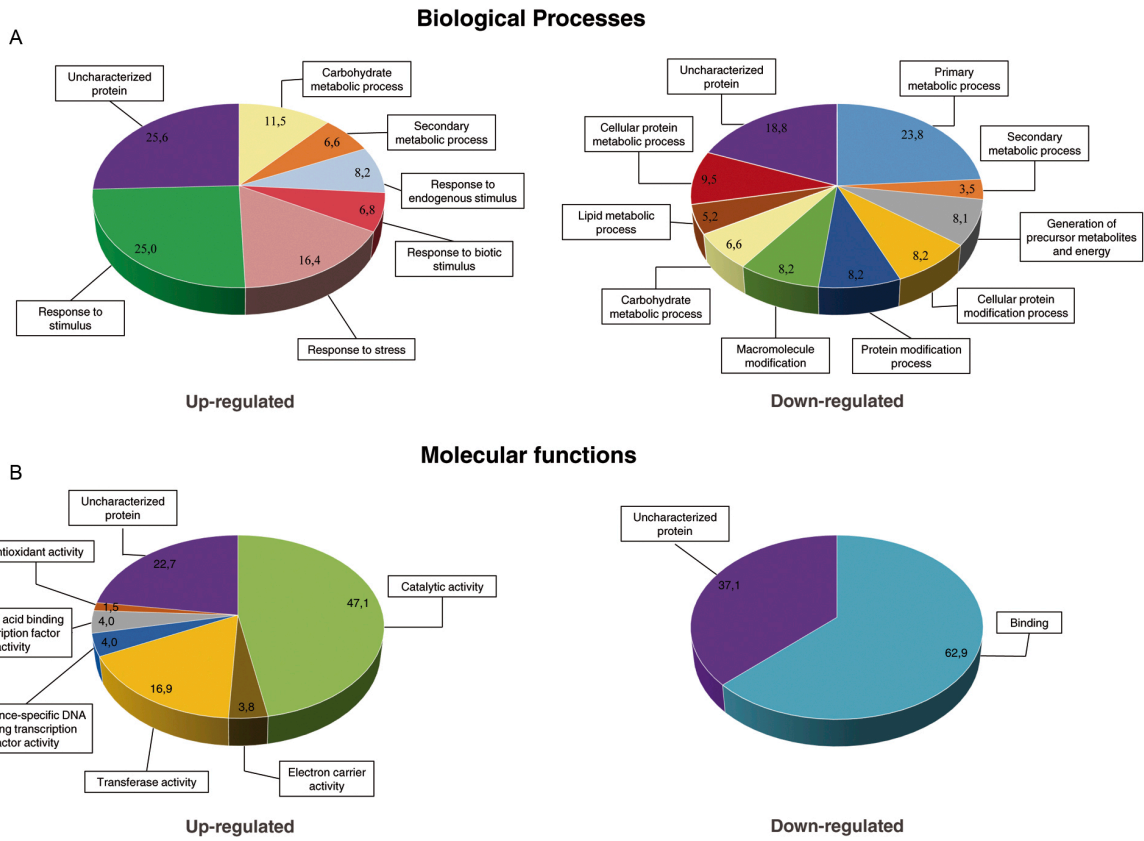

**Supplementary Figure S2.** Distribution of differentially up-regulated and down-regulated expressed genes in the *mc-vin* mutant relative to the wild-type Moneymaker cultivar in Gene Ontology (GO) annotation under (A) biological processes and (B) molecular functions categories.

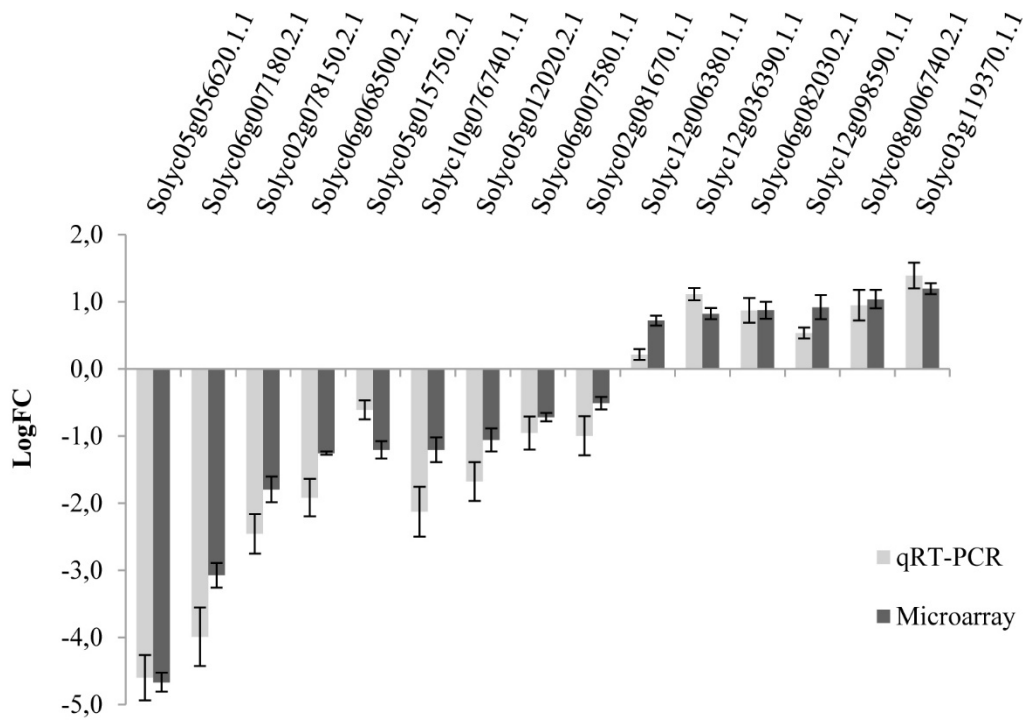

**Supplementary Figure S3.** Validation of the gene expression data obtained by the microarray using qRT-PCR. The panel show a comparison of the LogFC in expression levels measured by the microarray and qRT-PCR assays of 15 differentially expressed genes in the *mc-vin* mutant relative to the wild-type Moneymaker cultivar chosen at random from the microarray data.

**Supplementary Table S1.** Differentially up-regulated expressed genes in the *vegetative inflorescence (mc-vin)* mutant relative to the wild-type Moneymaker cultivar (adjusted p-value <0.05)

| GenBank Accession | TIGR Tomato Gene Index | SGN gene model ID  | Gene Description                                                               | LogFC      | adjusted p-value |
|-------------------|------------------------|--------------------|--------------------------------------------------------------------------------|------------|------------------|
| AW091778          |                        |                    | uncharacterized protein                                                        | 1.8177528  | 0.00234593       |
| AK320517          | TC243427               |                    | glutathione s-transferase                                                      | 1.75779773 | 0.03911017       |
| AK323458          | TC239836               |                    | auxin-induced protein                                                          | 1.55459005 | 0.00107071       |
| AW036494          |                        |                    | uncharacterized protein                                                        | 1.27643791 | 0.00983314       |
| AK328854          | TC223575               |                    | uncharacterized protein                                                        | 1.26638447 | 0.0391856        |
| AI490010          |                        | Solyc03g119370.1.1 | dna binding                                                                    | 1.19300129 | 0.03042268       |
| AK323953          | TC226520               | Solyc06g060760.2.1 | aquaporin tip2-3                                                               | 1.178691   | 0.02736339       |
| XR_182885         |                        | Solyc06g062380.2.1 | acid phosphatase                                                               | 1.13441026 | 0.03241277       |
| AK321469          | TC231875               |                    | membrane protein                                                               | 1.13376524 | 0.01216619       |
| DV103959          |                        |                    | heat stress transcription factor a-6b-like                                     | 1.12440262 | 0.02933588       |
| FS199047          |                        |                    | uncharacterized protein                                                        | 1.11323542 | 0.00107071       |
| AK329386          | TC225826               | Solyc11g006910.1.1 | ferredoxin- chloroplast                                                        | 1.10507625 | 0.00550285       |
| AK323732          | TC220284               | Solyc06g062370.2.1 | stem 28 kda glycoprotein                                                       | 1.1023103  | 0.03034746       |
| AW216944          |                        | Solyc04g054690.2.1 | l-ascorbate oxidase                                                            | 1.06959239 | 0.02660843       |
| DV104735          |                        |                    | uncharacterized protein                                                        | 1.04560703 | 0.02475616       |
| AK323831          | TC218686               | Solyc08g006740.2.1 | histidine decarboxylase                                                        | 1.03749797 | 0.01111077       |
| AI896114          |                        | Solyc02g068470.1.1 | uncharacterized protein                                                        | 1.0325516  | 0.0313441        |
| AK326930          | TC217220               | Solyc04g054690.2.1 | l-ascorbate oxidase                                                            | 1.00544205 | 0.01923255       |
| AW617236          |                        |                    | transposase                                                                    | 0.99952065 | 0.00529177       |
| BW691204          |                        |                    | uncharacterized protein                                                        | 0.97251921 | 0.02533161       |
| AI778224          |                        |                    | glutathione s-transferase                                                      | 0.97205833 | 0.01175905       |
| EG553019          | TC233327               |                    | uncharacterized protein                                                        | 0.95665028 | 0.03645518       |
| AK328082          | TC232716               | Solyc10g085230.1.1 | uncharacterized protein                                                        | 0.95148919 | 0.00757321       |
| AK322756          |                        |                    | cytochrome p450                                                                | 0.9394876  | 0.04726932       |
| AK329756          | TC217479               |                    | regulator of vps4 activity in the mvb pathway protein                          | 0.93868266 | 0.01513849       |
| Z18277            | NP000412               | Solyc02g085020.2.1 | dihydroflavonol 4-reductase                                                    | 0.93356648 | 0.0136293        |
| AJ785277          |                        |                    | iaa-amino acid hydrolase 9                                                     | 0.93348316 | 0.00784769       |
| AW035871          |                        | Solyc01g103630.2.1 | lactoylglutathione lyase                                                       | 0.93328354 | 0.03312049       |
| BT014540          | TC218176               | Solyc12g009930.1.1 | zeatin o-glucosyltransferase-like                                              | 0.92899689 | 0.01922578       |
| AK319507          | TC218425               | Solyc12g057070.1.1 | udp-glycosyltransferase 85a2-like                                              | 0.9242709  | 0.03791821       |
| DB710746          | TC221366               | Solyc08g068600.2.1 | histidine decarboxylase                                                        | 0.92417758 | 0.02178015       |
| AW032620          |                        |                    | uncharacterized protein                                                        | 0.91837343 | 0.0323025        |
| AK324517          |                        | Solyc12g098590.1.1 | udp-glycosyltransferase 75d1-like                                              | 0.91836888 | 0.01129466       |
| AJ278765          | TC217814               |                    | sugar transporter erd6-like 7                                                  | 0.91768151 | 0.00550285       |
| AK326564          | TC217475               |                    | glycine-rich protein                                                           | 0.91108938 | 0.03503395       |
| AK328581          | TC228944               |                    | auxin-induced protein                                                          | 0.89894606 | 0.03510861       |
| AK325240          | TC228215               |                    | cxe carboxylesterase                                                           | 0.89500475 | 0.04830703       |
| BT013539          | TC217273               |                    | beta-glucosidase 44-like                                                       | 0.89499028 | 0.00529177       |
| BG130930          |                        |                    | alpha-l-fucosidase 2                                                           | 0.89219817 | 0.0136293        |
| AK328389          | TC242265               | Solyc10g085010.1.1 | uncharacterized protein                                                        | 0.88408489 | 0.03213262       |
| BP894990          |                        |                    | uncharacterized protein                                                        | 0.874999   | 0.01112478       |
| CK720539          |                        | Solyc06g082030.2.1 | gibberellin 20-                                                                | 0.87194341 | 0.01129466       |
| ES894405          |                        |                    | s-adenosyl-l-methionine:benzoic acid salicylic acid carboxyl methyltransferase | 0.86959308 | 0.02973177       |
| AJ784587          | TC238182               | Solyc07g008380.1.1 | uncharacterized protein                                                        | 0.8545307  | 0.01824748       |

|              |           |                    |                                                         |            |            |
|--------------|-----------|--------------------|---------------------------------------------------------|------------|------------|
| AK327911     |           |                    | uncharacterized protein                                 | 0.85327727 | 0.04915587 |
| AW039501     |           |                    | uncharacterized protein                                 | 0.85206116 | 0.00684964 |
| GO373764     | TC245035  | Solyc02g062500.2.1 | 2-oxoglutarate-dependent dioxygenase                    | 0.8511215  | 0.01922613 |
| AK324883     | TC217742  | Solyc08g068690.1.1 | tyramine hydroxycinnamoyltransferase                    | 0.84797063 | 0.02545931 |
| AK329690     | TC236171  |                    | cyanidin-3-o-glucoside 2-o-glucuronosyltransferase-like | 0.83831862 | 0.02836822 |
| X98308       | TC218993  | Solyc06g053610.2.1 | myb-related transcription factor                        | 0.83637607 | 0.02338954 |
| DB700199     | TC242706  |                    | udp-d-glucose udp-d-galactose 4-epimerase 1             | 0.82374445 | 0.02061969 |
| DB684305     | TC229789  | Solyc12g036390.1.1 | calmodulin-binding protein                              | 0.82188739 | 0.03820845 |
| AK327834     |           |                    | uncharacterized protein                                 | 0.82175642 | 0.0113692  |
| AK329308     |           | Solyc03g044100.2.1 | peroxidase 73                                           | 0.82118536 | 0.01430581 |
| DB710333     |           |                    | nucleic acid binding                                    | 0.82071775 | 0.03886765 |
| XM_004248335 |           | Solyc10g006660.2.1 | Calcium-binding EF hand family protein                  | 0.81195343 | 0.03334823 |
| BM412833     | TC220122  |                    | probable anion transporter chloroplastic-like           | 0.80928922 | 0.01728035 |
| AK322040     | TC228312  |                    | uncharacterized protein                                 | 0.80344398 | 0.01482666 |
| BI422664     | TC236102  | Solyc07g006420.1.1 | uncharacterized protein                                 | 0.80109261 | 0.01978442 |
| AK329230     | TC221492  |                    | non-symbiotic hemoglobin class 1                        | 0.78551911 | 0.02540922 |
| AK323654     | TC232885  | Solyc12g008350.1.1 | dehydration-responsive element-binding protein 3-like   | 0.7839564  | 0.0211868  |
| AW033463     |           |                    | peroxidase                                              | 0.78203416 | 0.0153113  |
| BG127002     | TC219400  |                    | proline-rich protein                                    | 0.78063247 | 0.01570102 |
| AK321017     | TC240930  |                    | delta-type tonoplast intrinsic protein                  | 0.77789372 | 0.04897428 |
| AJ786362     | NP9243938 | Solyc10g086500.1.1 | uncharacterized protein                                 | 0.77312611 | 0.00781667 |
| EG553012     | TC236685  | Solyc10g007280.2.1 | mitochondrial chaperone bcs1                            | 0.77228359 | 0.04844452 |
| XM_004245412 | TC238487  | Solyc08g083090.1.1 | uncharacterized protein                                 | 0.7641747  | 0.00784769 |
| AK329507     | TC229571  |                    | uncharacterized protein                                 | 0.75570957 | 0.03880424 |
| AK246959     |           | Solyc08g059710.2.1 | uncharacterized protein                                 | 0.74635072 | 0.02283711 |
| AK247936     | TC228316  | Solyc08g068850.2.1 | proton pump interactor 1                                | 0.74604225 | 0.02660843 |
| AK319193     | TC240501  |                    | nad h dehydrogenase b2                                  | 0.73441262 | 0.03859621 |
| AK324991     | TC241519  |                    | cinnamoyl reductase                                     | 0.72838794 | 0.00931396 |
| AI486264     | TC231285  | Solyc12g005430.1.1 | uncharacterized protein                                 | 0.72627188 | 0.01513849 |
| BT012735     | TC239525  |                    | proline dehydrogenase                                   | 0.72526397 | 0.03518348 |
| AW625231     |           |                    | histidine decarboxylase                                 | 0.72142508 | 0.022386   |
| BT013817     | TC237888  |                    | atp-citrate synthase beta chain protein 1-like          | 0.72037979 | 0.01061813 |
| DV103891     | NP000198  | Solyc08g062450.1.1 | class ii small heat shock protein le-                   | 0.71884493 | 0.03042268 |
| AK321346     | TC218858  | Solyc08g080170.2.1 | 3-hydroxy-3-methylglutaryl coenzyme a synthase          | 0.71873923 | 0.0420314  |
| AK324589     | TC232049  | Solyc12g006380.1.1 | desacetoxylvindoline 4-                                 | 0.71823192 | 0.04070823 |
| AW622134     |           |                    | uncharacterized protein                                 | 0.71749367 | 0.02292687 |
| BE433370     |           |                    | uncharacterized protein                                 | 0.71749037 | 0.02292687 |
| GT166076     |           |                    | uncharacterized protein                                 | 0.71557649 | 0.0090368  |
| AK323977     | TC236975  |                    | plasma membrane intrinsic protein                       | 0.71554159 | 0.04273341 |
| XM_004251435 |           | Solyc12g005300.1.1 | chlorophyllase 2                                        | 0.71293046 | 0.03390315 |
| AK246855     | TC227047  |                    | hin1-like protein                                       | 0.71165418 | 0.04243355 |
| AI487050     |           | Solyc09g011860.2.1 | uncharacterized protein                                 | 0.71159303 | 0.0113692  |
| AW219781     | TC234758  | Solyc10g085280.1.1 | udp-glycosyltransferase 1                               | 0.71076    | 0.02545931 |
| BI210949     | TC225615  | Solyc05g015850.2.1 | wrky transcription                                      | 0.70898599 | 0.03791821 |
| BT012795     | TC229127  |                    | rubisco activase                                        | 0.7088392  | 0.02907994 |
| AK328022     |           | Solyc11g066580.1.1 | flavonoid 3 -hydroxylase                                | 0.70488776 | 0.03089331 |
| AK323868     | TC231135  | Solyc07g043460.2.1 | cytochrome p450                                         | 0.70382877 | 0.01129466 |
| CK468710     | TC223329  | Solyc09g011590.2.1 | auxin-induced protein                                   | 0.69829345 | 0.03135169 |
| CK715337     |           |                    | uncharacterized protein                                 | 0.69692367 | 0.01249343 |
| AF029349     | TC217277  | Solyc04g082030.1.1 | ornithine decarboxylase                                 | 0.69588897 | 0.01940886 |

|              |          |                    |                                                                 |            |            |
|--------------|----------|--------------------|-----------------------------------------------------------------|------------|------------|
| DV104500     |          | Solyc09g011570.2.1 | auxin-induced protein                                           | 0.6958605  | 0.02338426 |
| GT165473     |          |                    | uncharacterized protein                                         | 0.69422717 | 0.01573238 |
| AK323208     | TC218910 |                    | aspartic proteinase                                             | 0.6936543  | 0.03014318 |
| AW625000     |          |                    | uncharacterized protein                                         | 0.69361836 | 0.04451332 |
| AK323147     | TC239224 | Solyc01g096670.2.1 | cytochrome p450                                                 | 0.69356616 | 0.03968076 |
| BG131617     | TC235620 |                    | 2-oxoglutarate-dependent dioxygenase                            | 0.69326426 | 0.02292687 |
| XM_004252334 | TC226977 |                    | cytochrome p450                                                 | 0.69070155 | 0.01700186 |
| AK322397     |          |                    | atp binding                                                     | 0.68421009 | 0.03345707 |
| AI780377     |          | Solyc02g072400.1.1 | serine-threonine protein                                        | 0.68266362 | 0.02545931 |
| AK329920     |          |                    | uncharacterized protein                                         | 0.6803316  | 0.03473793 |
| AK326381     | TC226535 | Solyc09g007750.2.1 | atp binding                                                     | 0.67777135 | 0.02178015 |
| AK321949     | TC240663 | Solyc03g119250.2.1 | calmodulin binding protein                                      | 0.67252272 | 0.03651289 |
| AI896641     |          | Solyc11g012260.1.1 | uncharacterized protein                                         | 0.66781671 | 0.01609183 |
| AK323971     | TC239227 | Solyc08g082110.2.1 | probable wrky transcription factor 41                           | 0.66653426 | 0.02448464 |
| AK329526     | TC217904 |                    | auxin-induced protein                                           | 0.66601981 | 0.02736339 |
| AK320098     | TC228534 |                    | udp-glucose glucosyltransferase                                 | 0.66487521 | 0.01814823 |
| AK324830     |          | Solyc03g031730.2.1 | beta-glucosidase 47                                             | 0.66328719 | 0.01531596 |
| GO372605     | TC225453 |                    | two-component response regulator arr5                           | 0.6619064  | 0.01695193 |
| AK327381     | TC226022 | Solyc11g066890.1.1 | arogenate dehydratase prephenate dehydratase chloroplastic-like | 0.65928093 | 0.02621399 |
| AI486345     |          |                    | uncharacterized protein                                         | 0.65711382 | 0.02475616 |
| BW688367     | TC219408 | Solyc07g005380.2.1 | s-norococlaurine synthase-like                                  | 0.65662477 | 0.02736339 |
| BT012720     | TC218326 |                    | glutamine synthetase                                            | 0.65239002 | 0.01392768 |
| DB694012     |          |                    | uncharacterized protein                                         | 0.65207772 | 0.02385977 |
| AW979468     |          | Solyc03g113940.2.1 | calmodulin binding protein                                      | 0.65147913 | 0.04915587 |
| AK322618     | TC240616 | Solyc10g008410.1.1 | e3 ubiquitin-protein ligase rma1h1-like                         | 0.6502083  | 0.01940886 |
| CK715255     | TC223890 |                    | cinnamic acid 4-hydroxylase                                     | 0.64956376 | 0.03651629 |
| AK329686     | TC231955 |                    | cinnamyl alcohol dehydrogenase                                  | 0.64930446 | 0.03014318 |
| BI422154     |          |                    | uncharacterized protein                                         | 0.64904029 | 0.02408902 |
| AW038788     | TC236357 |                    | uncharacterized protein                                         | 0.64867748 | 0.031254   |
| XM_004246001 |          |                    | aspartic proteinase nepenthesin-1                               | 0.64827685 | 0.01814823 |
| ES892372     | TC236456 | Solyc05g055700.2.1 | uncharacterized protein                                         | 0.64806584 | 0.01045174 |
| EG553421     | TC226835 | Solyc04g078660.1.1 | n-hydroxycinnamoyl benzoyltransferase                           | 0.64791909 | 0.02368684 |
| AK329749     | TC242527 |                    | uncharacterized protein                                         | 0.64369381 | 0.01453292 |
| BG127730     |          |                    | ca2+ antiporter cation exchanger                                | 0.64054888 | 0.0366091  |
| AK324054     |          |                    | glycosyl hydrolase-like partial                                 | 0.63965778 | 0.02736339 |
| AY150039     | TC232665 |                    | kda class i heat shock protein                                  | 0.6374395  | 0.01513849 |
| BI206751     | TC224791 |                    | cytochrome p450                                                 | 0.63732582 | 0.01509349 |
| AW442693     |          |                    | auxin-induced protein                                           | 0.63686551 | 0.03042268 |
| BP889943     | TC243859 |                    | uncharacterized protein                                         | 0.63443146 | 0.01801284 |
| AK324002     | TC219586 |                    | lignin-forming anionic peroxidase                               | 0.63421795 | 0.02338954 |
| DB714953     |          |                    | sulfite exporter family protein                                 | 0.630419   | 0.031254   |
| BE431491     |          | Solyc03g058950.2.1 | phosphoglycerate mutase-like protein                            | 0.63021789 | 0.0218833  |
| CK715255     |          |                    | cinnamate 4-hydroxylase                                         | 0.63015062 | 0.0420314  |
| AF211790     |          |                    | uncharacterized protein                                         | 0.62964436 | 0.04602306 |
| BE431646     |          |                    | trans-cinnamate 4-hydroxylase                                   | 0.62788842 | 0.04260118 |
| BI421287     |          | Solyc03g007380.1.1 | uncharacterized protein                                         | 0.62773445 | 0.0402595  |
| AK319838     | TC223430 | Solyc07g062490.1.1 | epidermis-specific secreted glycoprotein ep1                    | 0.62538407 | 0.01513849 |
| AK323113     | TC232016 | Solyc07g043490.1.1 | udp-glucose:solanidine glucosyltransferase                      | 0.62518881 | 0.01513849 |
| AW932015     |          |                    | uncharacterized protein                                         | 0.62496577 | 0.01814823 |
| AW443102     | TC233725 |                    | uncharacterized protein                                         | 0.62455924 | 0.01814823 |

|              |          |                    |                                                                |            |            |
|--------------|----------|--------------------|----------------------------------------------------------------|------------|------------|
| BT013355     | TC223627 |                    | pathogenesis-related protein 4                                 | 0.62418564 | 0.04017979 |
| AK321158     | TC241857 | Solyc08g068620.1.1 | histidine decarboxylase                                        | 0.62388333 | 0.03651629 |
| XM_004233377 | TC233716 |                    | cytochrome p450                                                | 0.6224384  | 0.02715404 |
| AK328428     | TC229400 | Solyc03g083960.2.1 | haloacid dehalogenase-like hydrolase domain-containing protein | 0.62099277 | 0.01129466 |
| AK247332     | TC220494 | Solyc11g015890.1.1 | f-box protein                                                  | 0.61892333 | 0.02907994 |
| FS187400     | TC227584 | Solyc10g085950.1.1 | protein aluminum sensitive 3                                   | 0.61758707 | 0.04004804 |
| BI924118     |          | Solyc02g071710.2.1 | GDSL esterase/lipase At1g29670                                 | 0.61549818 | 0.02178015 |
| AI487784     |          |                    | gdsl esterase lipase                                           | 0.61423381 | 0.04397335 |
| AK322690     | TC241030 |                    | ring finger family protein                                     | 0.61175454 | 0.02140228 |
| AK327303     | TC231062 |                    | zinc finger ccch domain-containing protein                     | 0.61164933 | 0.02787856 |
| BT013052     | TC235672 |                    | proline rich protein                                           | 0.61163615 | 0.01728035 |
| AI488552     |          |                    | uncharacterized protein                                        | 0.61052646 | 0.031254   |
| DB700370     | TC239751 | Solyc06g006110.2.1 | vacuolar cation proton exchanger                               | 0.60959379 | 0.04014828 |
| XM_004246294 | TC239102 | Solyc09g013150.2.1 | probable anion transporter chloroplastic-like                  | 0.60879276 | 0.03575395 |
| AK320809     | TC237807 | Solyc04g009960.2.1 | threonine aldolase                                             | 0.60860693 | 0.02073976 |
| AK323007     | TC217660 | Solyc06g082590.1.1 | ap2 erf domain-containing transcription factor                 | 0.60685429 | 0.02787856 |
| AK328730     | TC231134 | Solyc12g100150.1.1 | LOB domain protein 4                                           | 0.60664586 | 0.03014318 |
| BT014571     |          |                    | act domain-containing protein                                  | 0.60462285 | 0.01940886 |
| GT164180     | TC231555 |                    | 1-deoxy-d-xylulose 5-phosphate synthase                        | 0.60391065 | 0.0218833  |
| DV105517     |          | Solyc07g063390.2.1 | beta-glucosidase 18-like                                       | 0.60301157 | 0.0113692  |
| BT013058     | TC224390 |                    | erg28 like protein                                             | 0.60294078 | 0.01392768 |
| BI421969     |          |                    | inosine-uridine preferring nucleoside hydrolase family protein | 0.60222164 | 0.04344963 |
| CK714819     | TC220503 |                    | abhydrolase domain                                             | 0.59972142 | 0.03561419 |
| BW688043     |          |                    | type-a response regulator                                      | 0.59620178 | 0.01463349 |
| AK322078     |          |                    | glycerol-3-phosphate transporter 5-like                        | 0.59557069 | 0.031254   |
| AI485590     |          |                    | cucumber peeling                                               | 0.59540236 | 0.01513849 |
| XM_004250354 | TC229000 |                    | lignin-forming anionic peroxidase                              | 0.59440716 | 0.0340683  |
| AA824883     |          | Solyc03g007760.2.1 | uncharacterized protein                                        | 0.59379124 | 0.0250884  |
| XM_004236380 | TC239209 |                    | auxin-induced protein 5ng4-like                                | 0.59172481 | 0.02533161 |
| AW037462     |          |                    | tyrosine specific protein phosphatase family protein           | 0.59092209 | 0.01932909 |
| AK323040     | TC220781 | Solyc07g055710.2.1 | heat shock factor                                              | 0.58897648 | 0.03765038 |
| XM_004235770 |          | Solyc03g119520.2.1 | uncharacterized protein                                        | 0.58793155 | 0.0136293  |
| U66300       | TC238942 | Solyc03g082420.2.1 | chloroplast small heat shock protein                           | 0.58565127 | 0.02621399 |
| BI422058     | TC223662 |                    | arogenate prephenate dehydratase                               | 0.58564228 | 0.03765038 |
| AK322970     | TC225589 | Solyc11g007730.1.1 | phosphorylase family protein                                   | 0.58353011 | 0.02292687 |
| AK326828     | TC229189 |                    | flavonoid 3-glucosyl transferase                               | 0.58241276 | 0.01824748 |
| BG631811     |          |                    | uncharacterized protein                                        | 0.57753273 | 0.01513849 |
| AK325911     | TC219980 | Solyc05g016310.1.1 | aspartic proteinase nepenthesin-2-like                         | 0.57725009 | 0.02514321 |
| BT014384     | TC232347 |                    | flavonol synthase flavanone 3-                                 | 0.57495888 | 0.02500165 |
| BT014279     | TC238580 |                    | monoglyceride lipase                                           | 0.57472087 | 0.031254   |
| AK247484     | TC243465 | Solyc01g091320.2.1 | c-4 sterol methyl oxidase                                      | 0.57439748 | 0.03733858 |
| AC215480     | TC221384 | Solyc02g093250.2.1 | caffeoyl- o-methyltransferase                                  | 0.57415469 | 0.03968271 |
| AI896828     |          |                    | uncharacterized protein                                        | 0.57386175 | 0.03880424 |
| AK326432     | TC234915 | Solyc05g009120.2.1 | uncharacterized protein                                        | 0.57382476 | 0.01890347 |
| BP877587     |          |                    | beta-glucosidase 44-like                                       | 0.57248102 | 0.02715404 |
| DB709383     |          | Solyc10g076480.1.1 | ammonium transporter                                           | 0.57126448 | 0.0402219  |
| BT013655     | TC242170 | Solyc11g006410.1.1 | uncharacterized protein                                        | 0.57098814 | 0.02172422 |
| AK323846     | TC239845 | Solyc06g083130.2.1 | MazG nucleotide pyrophosphohydrolase                           | 0.56919275 | 0.0376923  |
| AK320895     | TC231443 | Solyc03g025390.2.1 | rossmann-fold nad -binding domain-containing protein           | 0.56822017 | 0.04951034 |
| BG131246     | TC237643 |                    | apyrase                                                        | 0.56820407 | 0.01463349 |



|              |          |                    |                                                                              |            |            |
|--------------|----------|--------------------|------------------------------------------------------------------------------|------------|------------|
| AK323811     | TC223602 | Solyc08g077020.1.1 | uncharacterized protein                                                      | 0.56792528 | 0.01647345 |
| XM_004241581 | TC236549 |                    | lipid binding                                                                | 0.56774914 | 0.03275513 |
| AK320220     | TC220490 | Solyc02g092580.2.1 | peroxidase 73                                                                | 0.56476991 | 0.03880424 |
| AK324331     | TC235051 | Solyc11g010100.1.1 | gtp-binding protein                                                          | 0.56427811 | 0.02002032 |
| BG127254     |          |                    | uncharacterized protein                                                      | 0.56374285 | 0.02509365 |
| BI926166     |          |                    | secologanin synthase-like                                                    | 0.56323543 | 0.04444052 |
| AK328307     |          |                    | glucomannan 4-beta-mannosyltransferase 9-like                                | 0.56060651 | 0.0283751  |
| DB696023     | TC228652 |                    | uncharacterized protein                                                      | 0.5586268  | 0.02280798 |
| AK247983     | TC225553 |                    | uncharacterized protein                                                      | 0.55840757 | 0.02338426 |
| AK321958     | TC217531 | Solyc03g117250.2.1 | flotillin-like protein                                                       | 0.55764334 | 0.02509365 |
| AK324555     | TC219804 | Solyc02g093230.2.1 | caffeoyl- o-methyltransferase                                                | 0.55704963 | 0.02736339 |
| BG131008     |          |                    | proline rich protein                                                         | 0.55700672 | 0.0433385  |
| BF114318     |          | Solyc10g085380.1.1 | sex determination protein tasselseed-2-like                                  | 0.55485467 | 0.02514321 |
| AC216704     |          |                    | ninja-family protein afp3                                                    | 0.55467457 | 0.0136293  |
| AW216413     | TC236372 |                    | s-adenosylmethionine synthetase                                              | 0.55448704 | 0.02042812 |
| XM_004252080 | TC241138 |                    | cellulose synthase-like protein e6-like                                      | 0.55412545 | 0.04667545 |
| AK321165     |          |                    | probable leucine-rich repeat receptor-like protein kinase at1g68400-like     | 0.55089011 | 0.02966005 |
| BG628296     |          |                    | uncharacterized protein                                                      | 0.55044898 | 0.02207648 |
| AW648982     |          | Solyc07g045440.1.1 | fasciclin-like arabinogalactan protein                                       | 0.54989944 | 0.03016826 |
| AP009260     | TC234617 |                    | 60s ribosomal protein l13                                                    | 0.54969294 | 0.02736339 |
| EG552932     | TC233416 |                    | uncharacterized protein                                                      | 0.54893444 | 0.01824748 |
| XM_004231528 | TC244295 | Solyc02g030300.2.1 | g-type lectin s-receptor-like serine threonine-protein kinase at4g27290-like | 0.54758085 | 0.01840576 |
| AK322358     | TC228265 | Solyc02g080890.2.1 | wrky transcription factor 6-like                                             | 0.54599995 | 0.04217752 |
| AK327871     | TC219924 |                    | brassinosteroid-regulated protein bru1                                       | 0.54580088 | 0.0402595  |
| AK326022     | TC243613 | Solyc04g040180.2.1 | methyltransferase ddb_g0268948-like                                          | 0.54509674 | 0.04811726 |
| AK324897     | TC224303 | Solyc08g065150.1.1 | uncharacterized protein                                                      | 0.54369863 | 0.02509365 |
| AK247331     | TC222269 | Solyc11g066680.1.1 | zeatin o-glucosyltransferase-like                                            | 0.54242527 | 0.03470553 |
| EG553495     | TC228441 | Solyc08g078900.1.1 | protease inhibitor/seed storage/lipid transfer protein (LTP) family protein  | 0.54106831 | 0.02450945 |
| XM_004249215 | TC236687 |                    | 24-sterol c-methyltransferase                                                | 0.53758297 | 0.0368007  |
| AK329374     | TC230806 | Solyc09g009660.2.1 | solute carrier family 35 member f1-like                                      | 0.53634231 | 0.01940886 |
| AK322844     | TC239263 | Solyc01g010000.2.1 | uncharacterized protein                                                      | 0.53561497 | 0.02860306 |
| AI775181     | TC217355 |                    | ascorbate peroxidase                                                         | 0.5335653  | 0.02736339 |
| BI203889     |          |                    | uncharacterized protein                                                      | 0.53332981 | 0.02450945 |
| AK323625     | TC226469 |                    | nadh:quinone oxidoreductase                                                  | 0.5305919  | 0.02450945 |
| AK326842     | TC244366 |                    | type-a response regulator                                                    | 0.5298755  | 0.03004499 |
| BI922321     |          |                    | auxin-induced SAUR-like protein                                              | 0.52898281 | 0.01823317 |
| AK327096     | TC242691 | Solyc09g061860.2.1 | transferring glycosyl                                                        | 0.52847901 | 0.04411017 |
| BT014417     | TC224988 |                    | l-ascorbate oxidase homolog                                                  | 0.52617038 | 0.02503639 |
| AW626285     | TC234801 |                    | uncharacterized protein                                                      | 0.52554478 | 0.031254   |
| AK319920     | TC228340 | Solyc01g110290.2.1 | squalene synthase                                                            | 0.52385989 | 0.02545931 |
| AK319948     | TC228759 |                    | heparanase-like protein 3-like                                               | 0.52330313 | 0.04953338 |
| AK319503     | TC242239 |                    | 3-isopropylmalate dehydrogenase                                              | 0.52296399 | 0.02627242 |
| XM_004240990 |          | Solyc06g053930.2.1 | calmodulin-like protein                                                      | 0.51833656 | 0.01823317 |
| AW030968     |          |                    | uncharacterized protein                                                      | 0.5183104  | 0.02178015 |
| GO374941     | TC234820 |                    | spermidine synthase                                                          | 0.51825675 | 0.04951034 |
| DB717666     |          |                    | uncharacterized protein                                                      | 0.51807803 | 0.02521258 |
| AA824893     |          |                    | uncharacterized protein                                                      | 0.51661152 | 0.03880424 |
| AK322919     |          | Solyc04g005050.1.1 | matrix metalloprotease domain-containing protein                             | 0.51638603 | 0.04070823 |
| AK322540     | TC232963 |                    | 3-beta hydroxysteroid dehydrogenase                                          | 0.51579811 | 0.02388603 |
| AK247718     |          |                    | acyl- n-acyltransferases-like protein                                        | 0.51529105 | 0.01695193 |

|              |            |                    |                                              |            |            |
|--------------|------------|--------------------|----------------------------------------------|------------|------------|
| AK323518     | TC236796   |                    | transcription factor bhlh62-like             | 0.51411876 | 0.01700186 |
| GH622685     | TC217624   | Solyc06g076050.2.1 | e3 ubiquitin-protein ligase xbat31-like      | 0.51382705 | 0.02521258 |
| BG134081     |            | Solyc10g008000.1.1 | Light-dependent short hypocotyls 1           | 0.51209384 | 0.04624782 |
| BI422114     | TC224272   | Solyc09g011870.1.1 | arogenate dehydrogenase chloroplastic-like   | 0.51195789 | 0.03886765 |
| XM_004242757 | TC225326   |                    | nucleotide pyrophosphatase phosphodiesterase | 0.51003783 | 0.04090419 |
| AK321863     | TC230878   |                    | probable ribose-5-phosphate isomerase-like   | 0.51003486 | 0.031254   |
| AK327726     | TC237035   |                    | 6-phosphogluconate dehydrogenase             | 0.50997315 | 0.03032666 |
| AK328809     | TC236869   | Solyc06g009510.1.1 | transcription factor transcription regulator | 0.50968782 | 0.0340683  |
| AK328708     | TC221450   |                    | gtp-binding protein                          | 0.50726526 | 0.031254   |
| ES892135     |            | Solyc10g079600.1.1 | type-a response regulator                    | 0.50654759 | 0.0382606  |
| AK325882     | TC228088   |                    | uncharacterized protein                      | 0.50651621 | 0.0352324  |
| AK328438     | TC224533   |                    | 4-coumarate: ligase                          | 0.5061737  | 0.03914168 |
| CK348391     |            |                    | uncharacterized protein                      | 0.50521719 | 0.02521258 |
| GT167514     |            |                    | uncharacterized protein                      | 0.50408365 | 0.01728035 |
| XM_004238678 |            | Solyc05g006420.2.1 | type-a response regulator                    | 0.50336044 | 0.04661723 |
| BE434445     | TC230518   | Solyc05g054320.2.1 | epoxide hydrolase                            | 0.50212208 | 0.03510861 |
| AK319823     | TC229568   | Solyc12g006460.1.1 | ent-kaurenoic acid oxidase 2                 | 0.50189076 | 0.0218833  |
| AK323682     | TC218071   | Solyc06g009020.2.1 | glutathione s-transferase                    | 0.50111642 | 0.04017979 |
| X59883       |            |                    | glycine-rich rna binding protein             | 0.50097805 | 0.03204623 |
| BG127662     | TC231494   | Solyc10g083970.1.1 | s-adenosylmethionine synthetase              | 0.49930477 | 0.04444052 |
| AK326904     | TC220586   |                    | fumarylacetoacetase                          | 0.49741734 | 0.031254   |
| AW443419     | TC227819   |                    | uncharacterized protein                      | 0.4969031  | 0.03213262 |
| BI211145     | TC237490   |                    | xyloglucan endotransglucosylase hydrolase 7  | 0.49680259 | 0.04953338 |
| XM_004245630 | TC217204   | Solyc08g079880.1.1 | serine protease                              | 0.49613365 | 0.04004804 |
| BE450178     | TC236494   |                    | bag-domain protein 1 regulator of cell death | 0.49604119 | 0.03684043 |
| AW649155     |            |                    | act domain-containing protein                | 0.49406627 | 0.02521258 |
| BT013853     | TC239149   | Solyc05g005950.2.1 | probable peptide transporter at1g52190-like  | 0.49401029 | 0.02627242 |
| BG129166     | TC235096   |                    | expansin precursor                           | 0.49316699 | 0.03914168 |
| DB714303     |            |                    | uncharacterized protein                      | 0.49240329 | 0.02061969 |
| AK224857     | TC223918   | Solyc02g088910.2.1 | ninja-family protein afp3                    | 0.49040585 | 0.02509365 |
| AK325571     | TC227206   | Solyc07g005760.2.1 | hydroxycinnamoyl quinate transferase         | 0.48835821 | 0.03192294 |
| AK327971     | TC229286   |                    | calmodulin-like protein                      | 0.48720473 | 0.03942635 |
| BE353787     |            |                    | uncharacterized protein                      | 0.48663631 | 0.04014828 |
| AK328919     | TC234789   | Solyc08g005090.1.1 | uncharacterized protein                      | 0.4852982  | 0.02855956 |
| AK320178     |            |                    | cytochrome p450 83b1-like                    | 0.48336539 | 0.03575395 |
| XM_004242883 | TC224236   | Solyc07g019460.2.1 | cytochrome p450 reductase                    | 0.4820915  | 0.02736339 |
| AK322577     | TC245149   | Solyc03g112970.1.1 | uncharacterized protein                      | 0.48127131 | 0.04081726 |
| GT164027     |            |                    | uncharacterized protein                      | 0.48091174 | 0.03968271 |
| BT014282     | NP12919594 | Solyc06g007130.2.1 | omega-3 fatty acid desaturase                | 0.48012781 | 0.02292687 |
| BI921549     | TC243565   |                    | glycosyltransferase family 61 protein        | 0.47917946 | 0.0218833  |
| XM_004248080 | TC240211   |                    | gtp-binding protein                          | 0.47909173 | 0.031254   |
| ES895349     | TC240342   | Solyc03g114460.2.1 | acyl-activating enzyme 17                    | 0.47903852 | 0.02736339 |
| AK323065     | TC232387   | Solyc02g067440.2.1 | uncharacterized protein                      | 0.47792155 | 0.04802333 |
| AK224857     | TC230530   |                    | ninja-family protein afp3                    | 0.47657346 | 0.02545931 |
| AK325389     | TC234090   |                    | udp-glucose dehydrogenase                    | 0.47587241 | 0.03042268 |
| AW219705     |            | Solyc08g079550.1.1 | uncharacterized protein                      | 0.47586976 | 0.03780872 |
| AK247430     | TC232482   | Solyc05g006780.2.1 | actin cross-linking protein                  | 0.47436635 | 0.0433216  |
| AK324141     | TC232420   | Solyc02g063390.2.1 | uncharacterized protein                      | 0.47402316 | 0.03241277 |
| AK320053     | TC231722   | Solyc11g066820.1.1 | glucomannan 4-beta-mannosyltransferase 2     | 0.47401269 | 0.03014318 |
| AC244298     | TC237972   |                    | calcium-dependent protein                    | 0.47368976 | 0.02660843 |

|              |          |                    |                                                     |            |            |
|--------------|----------|--------------------|-----------------------------------------------------|------------|------------|
| AW218373     |          |                    | b12d-like protein                                   | 0.4733098  | 0.04772778 |
| BG134424     |          | Solyc03g006220.2.1 | protein trichome birefringence-like 38              | 0.47311619 | 0.02140228 |
| BT013258     | TC229631 |                    | dynammin-related protein 1e                         | 0.47292123 | 0.02450945 |
| AK320212     | TC217409 |                    | s-adenosyl-l-methionine synthetase                  | 0.46893319 | 0.03914168 |
| AK328892     | TC241957 | Solyc06g050500.2.1 | abscisic acid receptor pyl4                         | 0.46865765 | 0.02784704 |
| BP889010     |          |                    | uncharacterized protein                             | 0.46855885 | 0.02178015 |
| BT012939     | TC227099 | Solyc04g051860.2.1 | shikimate kinase                                    | 0.46779048 | 0.03780872 |
| GT166303     |          |                    | uncharacterized protein                             | 0.46570382 | 0.03491406 |
| AK322433     | TC218959 | Solyc07g056510.2.1 | glutathione s-transferase                           | 0.46546837 | 0.03914168 |
| BI935704     |          |                    | secologanin synthase-like                           | 0.46529466 | 0.03518348 |
| AK320908     | TC223300 | Solyc09g083280.2.1 | uncharacterized protein                             | 0.46505788 | 0.02909651 |
| BI933296     |          |                    | auxin-responsive protein iaa7                       | 0.46394609 | 0.04915587 |
| AK329436     |          |                    | pi-plc x domain-containing protein at5g67130-like   | 0.46278764 | 0.04442187 |
| AK321308     | TC229183 | Solyc01g107670.2.1 | leucine-rich repeat disease resistance protein      | 0.4617629  | 0.02140228 |
| FS204922     |          | Solyc08g063130.2.1 | 3-hydroxybenzoate 6-hydroxylase 1-like              | 0.46060789 | 0.03765038 |
| DB691528     | TC229671 | Solyc01g110060.2.1 | purple acid phosphatase                             | 0.46033338 | 0.04143213 |
| GO375240     |          |                    | bZIP transcription factor                           | 0.45955676 | 0.0402595  |
| AK322988     | TC241252 |                    | uncharacterized protein                             | 0.45780536 | 0.03592504 |
| XM_004244225 | TC238921 |                    | secologanin synthase-like                           | 0.45775229 | 0.031254   |
| BG140300     |          |                    | uncharacterized protein                             | 0.45730793 | 0.04397335 |
| AW624867     |          | Solyc09g075680.1.1 | 2-hydroxyisoflavanone dehydratase                   | 0.45709631 | 0.04921428 |
| DB719859     | TC221746 | Solyc02g082550.2.1 | protein kinase                                      | 0.45628379 | 0.03657075 |
| DB684794     |          |                    | aminotransferase y4ub                               | 0.45597935 | 0.04921428 |
| BW691431     |          |                    | uncharacterized protein                             | 0.45548059 | 0.031254   |
| AF059489     | TC219221 | Solyc02g088100.2.1 | expansin                                            | 0.45464563 | 0.0376923  |
| BE459640     |          |                    | uncharacterized protein                             | 0.45406175 | 0.02660843 |
| AK247484     |          |                    | c-4 sterol methyl oxidase                           | 0.4522931  | 0.03330195 |
| AK326917     | TC227487 | Solyc08g008280.2.1 | uncharacterized protein                             | 0.44985089 | 0.04444052 |
| AK327796     | TC226466 |                    | vacuolar atp synthase 21 kda proteolipid subunit    | 0.44973575 | 0.03880424 |
| AW032389     | TC222470 | Solyc02g080070.2.1 | receptor-like serine-threonine protein kinase       | 0.4491839  | 0.03576305 |
| AK328380     | TC225665 |                    | phosphate phosphoenolpyruvate translocator          | 0.4491474  | 0.0352324  |
| AK321464     | TC232149 | Solyc11g066830.1.1 | u2 snrnp auxiliary small                            | 0.44619208 | 0.02736339 |
| AK329953     | TC218188 |                    | rna recognition motif-containing protein            | 0.44599456 | 0.03880424 |
| AK326646     | TC222681 |                    | uncharacterized protein                             | 0.44526649 | 0.02345875 |
| AI486252     |          |                    | tyrosine-specific transport                         | 0.44439089 | 0.02909651 |
| DB726092     | TC228835 |                    | uncharacterized protein                             | 0.44339671 | 0.0420314  |
| BT014069     | TC218881 | Solyc08g041770.2.1 | uncharacterized protein                             | 0.44330447 | 0.03968271 |
| BW688261     | TC217617 | Solyc09g064940.2.1 | phenazine biosynthesis                              | 0.442307   | 0.02664653 |
| AJ002590     | TC224441 | Solyc04g078470.2.1 | d3-type cyclin                                      | 0.44152057 | 0.02540338 |
| BT013379     |          |                    | glucose-6-phosphate 1-epimerase-like                | 0.44012695 | 0.04025063 |
| AI780199     |          |                    | uncharacterized protein                             | 0.43964352 | 0.03914168 |
| DV105571     | TC231325 |                    | uncharacterized protein                             | 0.43938557 | 0.04624782 |
| BI205061     |          |                    | l-ascorbate oxidase homolog                         | 0.43886075 | 0.03839557 |
| AW623604     | TC244799 |                    | uncharacterized protein                             | 0.43885463 | 0.03518348 |
| AK324347     | TC231671 | Solyc11g066060.1.1 | heat shock protein 70                               | 0.4380342  | 0.02503639 |
| BI204050     | TC242557 | Solyc03g031800.2.1 | xyloglucan endotransglucosylase hydrolase protein a | 0.43739969 | 0.04286715 |
| AW154840     | TC245259 |                    | uncharacterized protein                             | 0.43717627 | 0.04802333 |
| AJ831477     |          |                    | uncharacterized protein                             | 0.43714538 | 0.04017979 |
| BW686429     | TC218485 | Solyc02g087770.2.1 | aldose 1-epimerase                                  | 0.43675917 | 0.02636752 |
| AK326383     |          |                    | uncharacterized protein                             | 0.43636843 | 0.03886765 |

|              |          |                    |                                                      |            |            |
|--------------|----------|--------------------|------------------------------------------------------|------------|------------|
| AI637314     |          |                    | uncharacterized protein                              | 0.43611576 | 0.03588922 |
| AK326688     | TC230885 |                    | monocopper oxidase-like protein sku5                 | 0.43560749 | 0.03733858 |
| AK323203     | TC217324 |                    | mitogen-activated protein kinase kinase 5            | 0.4354003  | 0.0340683  |
| XM_004237845 | TC222512 |                    | endoplasmic reticulum vesicle transporter protein    | 0.43489434 | 0.04017979 |
| XM_004228962 | TC231758 | Solyc01g059880.2.1 | atp-citrate synthase beta chain protein 1-like       | 0.43474202 | 0.03503395 |
| XM_004236986 |          | Solyc04g005670.1.1 | kelch repeat-containing f-box family protein         | 0.4336903  | 0.04017979 |
| GT163523     |          |                    | uncharacterized protein                              | 0.43343569 | 0.04802333 |
| AK320967     | TC244827 |                    | methylenetetrahydrofolate reductase                  | 0.43338787 | 0.03880424 |
| AK319588     | TC218321 |                    | isocitrate dehydrogenase                             | 0.4332856  | 0.02621399 |
| BI210488     | TC233207 |                    | phosphoglucomutase                                   | 0.43314245 | 0.02715404 |
| AK327370     | TC225945 | Solyc08g075230.1.1 | Genomic DNA chromosome 5 P1 clone MDA7               | 0.43313757 | 0.03213262 |
| AI895966     |          |                    | phenazine biosynthesis                               | 0.43269343 | 0.02545931 |
| XM_004253452 |          | Solyc00g206460.1.1 | uncharacterized protein                              | 0.43197401 | 0.04953338 |
| AK326427     | TC234206 |                    | protein tify 6b-like                                 | 0.43188601 | 0.03677927 |
| BG735249     |          |                    | uncharacterized protein                              | 0.43178793 | 0.03051034 |
| AK327187     | TC223658 | Solyc12g013690.1.1 | fad nad -binding oxidoreductase family protein       | 0.42878431 | 0.03462098 |
| AK323740     | TC217246 |                    | 1-aminocyclopropane-1-carboxylate synthase           | 0.42856214 | 0.04213426 |
| AW621890     | TC232400 |                    | acetyl- cytosolic                                    | 0.42804782 | 0.04014828 |
| AK324936     |          |                    | mevalonate kinase                                    | 0.42569143 | 0.04046689 |
| EF151131     | TC222707 |                    | uncharacterized protein                              | 0.42522225 | 0.03968076 |
| BP908190     |          |                    | uncharacterized protein                              | 0.4248563  | 0.03880424 |
| AK323579     | TC234071 |                    | probable 3-beta-hydroxysteroid-delta -isomerase-like | 0.42409389 | 0.031254   |
| BP890506     |          |                    | uncharacterized protein                              | 0.42361164 | 0.02540338 |
| AK325637     | TC217699 |                    | copper ion binding                                   | 0.42267593 | 0.03958396 |
| AK324581     | TC237549 | Solyc11g010500.1.1 | mitochondrial dicarboxylate carrier                  | 0.42239095 | 0.03474152 |
| BT012975     | TC228133 |                    | annexin p35                                          | 0.42188829 | 0.03334823 |
| BT013237     | TC235420 |                    | beta-d-glucan exohydrolase-like protein              | 0.42174252 | 0.0376923  |
| AW944799     |          |                    | pyruvate cytosolic isozyme-like                      | 0.42144447 | 0.03588922 |
| AC233133     | TC243063 |                    | aminotransferase class IV family protein             | 0.42017387 | 0.03576305 |
| EG553638     | TC244519 |                    | uncharacterized protein                              | 0.41989386 | 0.04735608 |
| BI935660     |          | Solyc10g084930.1.1 | protein kinase                                       | 0.41975399 | 0.03518348 |
| AK326055     | TC235019 |                    | methyltransferase pmt9                               | 0.41768873 | 0.04130896 |
| AK323013     | TC240689 | Solyc03g116710.2.1 | GTP binding protein                                  | 0.41737399 | 0.0420314  |
| AI485975     | TC229216 |                    | beta- -xylosidase                                    | 0.41734428 | 0.04209266 |
| XM_004239985 |          |                    | endo- -beta-xylanase c                               | 0.41696006 | 0.03880424 |
| AW037866     |          |                    | uncharacterized protein                              | 0.41634116 | 0.02907994 |
| AI484010     | TC228626 |                    | bzip transcription factor                            | 0.41624788 | 0.04792261 |
| GO372328     | TC231321 |                    | glutaredoxin                                         | 0.41517619 | 0.04269999 |
| AK328036     | TC233970 |                    | zinc finger protein                                  | 0.41472861 | 0.04921428 |
| DB678717     | TC224802 |                    | embryo-specific protein                              | 0.4142639  | 0.04017979 |
| AK247712     |          |                    | dehydroquinate dehydratase shikimate dehydrogenase   | 0.41410667 | 0.04070823 |
| AW219445     | TC240036 | Solyc01g073880.2.1 | rrna intron-encoded homing endonuclease              | 0.41390552 | 0.03510861 |
| ES894904     | TC225585 |                    | uncharacterized protein                              | 0.41295323 | 0.0360622  |
| DV104791     |          |                    | uncharacterized protein                              | 0.41255612 | 0.04336363 |
| AK323190     | TC232806 | Solyc03g117330.2.1 | uncharacterized protein                              | 0.41148933 | 0.02707424 |
| AC216910     | TC230766 |                    | alcohol dehydrogenase class iii                      | 0.41045635 | 0.04070823 |
| AK322250     | TC231972 |                    | aromatic and neutral amino acid transporter          | 0.40752518 | 0.02890416 |
| AK323973     |          |                    | uncharacterized protein                              | 0.40615656 | 0.03968271 |
| AW033973     | TC237370 |                    | 6-phosphofructokinase chloroplastic-like             | 0.40498494 | 0.031254   |
| AK319852     | TC232840 | Solyc01g100000.2.1 | MEE66 (maternal effect embryo arrest 66)             | 0.40478679 | 0.0352324  |

|              |          |                          |                                                                     |            |            |
|--------------|----------|--------------------------|---------------------------------------------------------------------|------------|------------|
| AK323168     | TC235026 |                          | 20s proteasome subunit paf1                                         | 0.40371863 | 0.03749231 |
| AK326131     | TC235679 |                          | xyloglucan galactosyltransferase                                    | 0.40321105 | 0.04661723 |
| AW032973     |          |                          | u-box domain-containing protein 4-like                              | 0.40137954 | 0.04191195 |
| AW219022     | TC230272 |                          | mads-box protein                                                    | 0.40129173 | 0.02798648 |
| BI921863     | TC235246 | Solyc02g067800.2.1       | lob domain-containing protein 25                                    | 0.40115927 | 0.04143213 |
| BI422137     | TC227221 | Solyc09g014990.2.1       | wrky-type transcription factor                                      | 0.40073805 | 0.03880424 |
| AK323990     | TC223096 |                          | type-a response regulator                                           | 0.39924691 | 0.04070823 |
| AK320306     | TC235143 |                          | membrane protein                                                    | 0.39912123 | 0.04758869 |
| AK320450     | TC237031 | Solyc04g070980.2.1       | cycloartenol synthase                                               | 0.39759125 | 0.03491406 |
| AC217002     | TC223619 |                          | udp-d-apiose udp-d-xylose synthase 1                                | 0.39755346 | 0.03859621 |
| AK320874     | TC221959 | Solyc12g045020.1.1       | cytochrome p450                                                     | 0.3973908  | 0.0399106  |
| AF124139     | TC218004 |                          | uncharacterized protein                                             | 0.39731143 | 0.031254   |
| AI898979     |          |                          | 70 kda peptidyl-prolyl isomerase                                    | 0.3956785  | 0.03505235 |
| BP904822     |          |                          | uncharacterized protein                                             | 0.3953925  | 0.0397115  |
| AK325190     | TC239316 |                          | udp-galactose transporter 2-like                                    | 0.39506202 | 0.03241277 |
| BG631767     |          |                          | uncharacterized protein                                             | 0.39165823 | 0.03470553 |
| BI423148     | TC236084 | Solyc08g014570.2.1       | ankyrin repeat-containing protein at5g02620-like                    | 0.39101062 | 0.03968076 |
| AK322703     | TC220192 | Solyc03g112540.2.1       | rossmann-fold nad -binding domain-containing protein                | 0.39076532 | 0.031254   |
| AW219448     |          | Solyc05g018110.1.1; Soly | Ulp1 protease family C-terminal catalytic domain containing protein | 0.39005085 | 0.03241277 |
| GT165053     | TC229420 |                          | probable peptide transporter at1g52190-like                         | 0.38760582 | 0.03576305 |
| AK320937     | TC228726 |                          | acetyl- c-acetyltransferase                                         | 0.38706904 | 0.03474152 |
| AW625543     |          |                          | uncharacterized protein                                             | 0.38378445 | 0.03886765 |
| AK327640     |          |                          | uncharacterized protein                                             | 0.38377295 | 0.04151738 |
| DV105061     |          |                          | uncharacterized protein                                             | 0.38373864 | 0.04624782 |
| AW649514     | TC244934 |                          | methionine synthase                                                 | 0.38323239 | 0.04958531 |
| XM_006342039 | TC230437 | Solyc04g082130.2.1       | trna pseudouridine synthase pus10-like                              | 0.38316402 | 0.04004804 |
| AK324127     | TC226646 |                          | protein notum homolog                                               | 0.38312581 | 0.04297324 |
| AK328499     | TC237652 |                          | glucan endo- -beta-glucosidase 4-like                               | 0.38301449 | 0.04830117 |
| BI933507     | TC240895 |                          | atp-citrate lyase a-1                                               | 0.37985123 | 0.04245491 |
| AK247870     | TC226773 |                          | s-type anion channel slah3-like                                     | 0.37982199 | 0.03820904 |
| AK325212     | TC217440 | Solyc06g034110.2.1       | acid phosphatase                                                    | 0.37970215 | 0.04070823 |
| U21800       | TC239214 |                          | hyoscyamine 6 beta-hydroxylase                                      | 0.37968272 | 0.0420314  |
| AJ784637     | TC242194 |                          | uncharacterized protein                                             | 0.37951705 | 0.04360618 |
| AK323335     | TC225624 |                          | cytochrome c                                                        | 0.37946425 | 0.0382606  |
| AK320360     | TC219384 | Solyc10g083940.1.1       | major facilitator protein                                           | 0.37800065 | 0.04531512 |
| AK319596     | TC235856 |                          | adenylosuccinate synthetase                                         | 0.37636347 | 0.04311359 |
| AK322827     | TC235383 | Solyc12g008650.1.1       | myo-inositol oxygenase                                              | 0.37532534 | 0.03880424 |
| BI926404     |          | Solyc01g107180.2.1       | btb poz domain-containing protein npy2-like                         | 0.37453619 | 0.03791821 |
| AJ277944     | TC228062 |                          | uncharacterized protein                                             | 0.3732642  | 0.04164235 |
| XM_004232986 | TC241771 |                          | u-box domain-containing protein 17-like                             | 0.37071087 | 0.03886765 |
| AI895309     |          | Solyc03g006080.2.1       | serine-threonine protein plant-                                     | 0.37045909 | 0.04130896 |
| AK324941     | TC217783 |                          | farnesyl diphosphate synthase                                       | 0.37008026 | 0.03942635 |
| AK325476     |          |                          | u3 small nucleolar rna-associated protein 18 homolog                | 0.3687848  | 0.03880424 |
| AK322292     | TC238277 |                          | snare associated golgi protein                                      | 0.36863135 | 0.04424732 |
| BF096327     |          | Solyc03g120660.2.1       | hydroxyphenylpyruvate reductase                                     | 0.36835181 | 0.04117608 |
| AK329598     | TC237358 | Solyc00g050430.2.1       | transcription factor bhlh93                                         | 0.36696075 | 0.04070823 |
| DB708167     | TC224886 | Solyc01g091130.2.1       | nitroreductase-like protein                                         | 0.36694506 | 0.03732846 |
| AW036165     |          |                          | uncharacterized protein                                             | 0.36671666 | 0.04188161 |
| BP911113     |          |                          | uncharacterized protein                                             | 0.36655138 | 0.04288534 |
| DB710831     | TC234803 | Solyc06g075610.1.1       | protein binding                                                     | 0.36567895 | 0.04311359 |

|              |          |                    |                                           |            |            |
|--------------|----------|--------------------|-------------------------------------------|------------|------------|
| AK327809     | TC221542 |                    | uncharacterized protein                   | 0.36558231 | 0.04530457 |
| AK321560     | TC228819 | Solyc12g015880.1.1 | heat shock protein 90                     | 0.36408823 | 0.04399938 |
| BT012792     | TC240006 |                    | calcium-dependent protein kinase          | 0.36370949 | 0.04651407 |
| GO373561     | TC235403 |                    | nadh-cytochrome b5 reductase              | 0.36365896 | 0.0382606  |
| AK322729     | TC235564 |                    | beta-ig-h3 domain-containing protein      | 0.36258189 | 0.04915587 |
| ES896542     | TC238553 |                    | caax prenyl protease                      | 0.3614833  | 0.03995041 |
| BG628653     |          |                    | uncharacterized protein                   | 0.36144475 | 0.0488478  |
| DB690492     |          |                    | erg28 like protein                        | 0.36063479 | 0.04667545 |
| CD002712     | TC233413 |                    | uncharacterized protein                   | 0.36006525 | 0.04897402 |
| BI208606     |          |                    | 14-3-3-like protein                       | 0.35865048 | 0.04217752 |
| AC246677     | TC226076 |                    | nadh dehydrogenase                        | 0.3582599  | 0.03893604 |
| GT165145     | TC219365 | Solyc01g067000.2.1 | uncharacterized protein                   | 0.35721003 | 0.04772663 |
| GO376270     | TC226698 |                    | 14-3-3 protein                            | 0.35711762 | 0.03957817 |
| AK325550     |          |                    | beta-ketoacyl-coa synthase family protein | 0.35700482 | 0.04085008 |
| AW624068     | TC232368 |                    | hyoscyamine 6 beta-hydroxylase            | 0.35590993 | 0.04709    |
| AK247401     | TC233365 |                    | gata transcription factor                 | 0.35543395 | 0.04451332 |
| AW217373     |          |                    | uncharacterized protein                   | 0.35476516 | 0.03886765 |
| DB710690     |          |                    | gtp-binding protein                       | 0.35460417 | 0.03657075 |
| ES895259     | TC228558 |                    | cytochrome b5                             | 0.35385485 | 0.04709    |
| AK323257     | TC219651 | Solyc01g109720.2.1 | uncharacterized protein                   | 0.35262805 | 0.04844452 |
| BT014295     |          |                    | glutathione reductase                     | 0.35032716 | 0.04164597 |
| BI930044     |          |                    | uncharacterized protein                   | 0.35023982 | 0.03968076 |
| DB713872     |          |                    | uncharacterized protein                   | 0.34979507 | 0.03714318 |
| XM_004238973 |          | Solyc05g011920.2.1 | act domain-containing protein             | 0.34889618 | 0.04984299 |
| AK328310     | TC226620 | Solyc03g062830.2.1 | nudix hydrolase chloroplastic-like        | 0.34889563 | 0.04297324 |
| AK326761     | TC229776 | Solyc06g071540.2.1 | uncharacterized protein                   | 0.34214855 | 0.0434884  |
| AK322417     | TC223808 |                    | thioredoxin h2                            | 0.34196009 | 0.04453379 |
| AW038260     |          |                    | uncharacterized protein                   | 0.34067382 | 0.04824376 |
| BT014563     | TC226145 |                    | uncharacterized protein                   | 0.34016739 | 0.04081286 |
| AK247615     |          |                    | sphingoid base hydroxylase 2              | 0.3398818  | 0.0434178  |
| BE458334     | TC235649 | Solyc08g079530.2.1 | cpd photolyase                            | 0.33124656 | 0.0433216  |
| AY013255     | TC218059 |                    | phospholipase d                           | 0.33123326 | 0.04542311 |
| AK319688     | TC235472 |                    | peroxidase 5-like                         | 0.32916466 | 0.04826918 |
| AK247006     | TC232895 | Solyc01g087890.2.1 | protein pns1                              | 0.3241649  | 0.04429305 |
| AK323460     | TC223756 |                    | gamma carbonic anhydrase like 1           | 0.32306052 | 0.04522901 |
| XM_004246391 |          | Solyc09g010970.2.1 | beta carbonic anhydrase 5                 | 0.3194881  | 0.04830117 |
| BT012699     | TC237876 |                    | s-adenosyl-l-methionine synthetase        | 0.31523807 | 0.04844452 |
| BI926080     |          |                    | uncharacterized protein                   | 0.31205933 | 0.04830283 |

**Supplementary Table S2.** Differentially down-regulated expressed genes in the *vegetative inflorescence (mc-vin)* mutant relative to the wild-type Moneymaker cultivar (adjusted p-value <0.05)

| GenBank Accession | TIGR Tomato Gene Index | SGN gene model ID  | Gene Description                                         | LogFC       | adjusted p-value |
|-------------------|------------------------|--------------------|----------------------------------------------------------|-------------|------------------|
| AY306154          | TC218844               | Solyc05g056620.1.1 | mads-box transcription factor                            | -4.6706063  | 2.35E-05         |
| AW625684          | TC239537               | Solyc06g007180.2.1 | asparagine synthetase                                    | -3.07577859 | 0.01129466       |
| AI491143          |                        |                    | peroxidase-like partial                                  | -2.14104105 | 0.02715404       |
| BE460111          |                        | Solyc02g078150.2.1 | plant-specific domain TIGR01615 family protein           | -1.79653007 | 0.00494161       |
| DV105097          | TC234897               |                    | uncharacterized protein                                  | -1.48738489 | 0.00107071       |
| BG126346          | TC237695               |                    | uncharacterized protein                                  | -1.38138377 | 0.00550285       |
| AK324738          | TC237918               | Solyc06g050320.2.1 | hmg-box (high mobility group) dna-binding family protein | -1.30877409 | 0.02140228       |
| BI209569          |                        |                    | uncharacterized protein                                  | -1.30323543 | 0.00132201       |
| AW039692          |                        |                    | DNA binding protein                                      | -1.29480846 | 0.0340683        |
| BI932387          |                        | Solyc02g079810.1.1 | transcription factor dysfunctional tapetum 1-like        | -1.2701243  | 0.00781667       |
| BW692560          | TC233191               | Solyc06g068500.2.1 | heat shock protein binding protein                       | -1.25472589 | 0.00529177       |
| AK324162          | TC237676               | Solyc01g099990.2.1 | f-box protein pp2-b15                                    | -1.22427831 | 0.04792261       |
| AJ289776          | TC240464               |                    | kunitz-type protease inhibitor precursor                 | -1.21220033 | 0.02627242       |
| AY294330          | TC217461               | Solyc05g015750.2.1 | transcription factor                                     | -1.20820838 | 0.04399253       |
| AW221811          |                        | Solyc10g076740.1.1 | isoamyl acetate-hydrolyzing                              | -1.20641687 | 0.00616242       |
| AW220104          | TC229018               |                    | uncharacterized protein                                  | -1.19565511 | 0.02533161       |
| AK247425          | TC234006               |                    | fructose-bisphosphate aldolase                           | -1.1729753  | 0.02059367       |
| AK247631          | TC228498               |                    | uncharacterized protein                                  | -1.16896361 | 0.01728035       |
| AK321955          | TC229919               |                    | gdsl esterase lipase cprd49                              | -1.16448753 | 0.0118309        |
| BI203929          | TC235918               |                    | uncharacterized protein                                  | -1.11879691 | 0.00234593       |
| BI203547          |                        |                    | extensin                                                 | -1.10448619 | 0.00251781       |
| AK325711          | TC235595               | Solyc05g012020.2.1 | mads-box transcription factor                            | -1.06001415 | 0.00784769       |
| AK247741          | TC222894               |                    | uncharacterized protein                                  | -1.05233072 | 0.00234593       |
| AK325110          | TC219509               |                    | fructose-bisphosphatase                                  | -1.05132077 | 0.00757321       |
| Z46675            | NP000341               |                    | extensin                                                 | -1.04008001 | 0.00550285       |
| AK246316          | TC218602               |                    | senescence-associated protein                            | -1.03926825 | 0.00848587       |
| ES897351          | TC239970               | Solyc01g088430.2.1 | protein wax2-like                                        | -1.03471875 | 0.00529177       |
| AY098735          | TC221404               |                    | tagl1 transcription factor                               | -1.02236336 | 0.03880424       |
| GO372423          | TC222434               |                    | auxin repressed/dormancy associated protein              | -1.02151641 | 0.01688604       |
| BP899244          |                        |                    | chlorophyll a b binding protein                          | -1.01445743 | 0.02172422       |
| DB717848          | TC230994               |                    | uncharacterized protein                                  | -1.00887786 | 0.0113692        |
| BE354727          |                        |                    | kunitz-type protease inhibitor precursor                 | -0.99631249 | 0.03491406       |
| BP905539          | TC234669               |                    | glycine-rich protein LeGRP1                              | -0.98568513 | 0.01728035       |
| DB714089          | TC219675               |                    | uncharacterized protein                                  | -0.97575395 | 0.01121716       |
| AJ459816          | TC225596               | Solyc06g062540.2.1 | phosphoethanolamine phosphocholine                       | -0.96184686 | 0.00529177       |
| AK321639          | TC239721               |                    | uncharacterized protein                                  | -0.95193208 | 0.0330068        |
| AK247885          | TC227018               |                    | ribose-phosphate pyrophosphokinase 2                     | -0.94697611 | 0.00550285       |
| AJ538329          | NP597560               |                    | protein wuschel                                          | -0.94539119 | 0.03880424       |
| AK246535          | TC224738               |                    | chlorophyll a b binding protein                          | -0.93711381 | 0.02736339       |
| BI931727          | TC230794               |                    | mitogen-activated protein kinase kinase kinase 5         | -0.93298563 | 0.01216619       |
| BT014016          |                        |                    | cysteine synthase                                        | -0.93115475 | 0.02795052       |
| XM_004229647      | TC223079               |                    | protein wax2-like                                        | -0.92807982 | 0.01129466       |

|              |          |                    |                                                            |             |            |
|--------------|----------|--------------------|------------------------------------------------------------|-------------|------------|
| AK322182     | TC220790 | Solyc09g092260.2.1 | uncharacterized protein                                    | -0.92611605 | 0.02122653 |
| BI208387     | TC224432 |                    | uncharacterized protein                                    | -0.9250578  | 0.02966005 |
| AK324061     | TC221778 |                    | glycine-rich rna binding protein                           | -0.91347756 | 0.01578147 |
| X60760       | NP000351 |                    | mads-box protein                                           | -0.90652016 | 0.01392768 |
| NM_001247451 | TC228102 | Solyc03g114840.2.1 | mads-box protein 1                                         | -0.89572786 | 0.0382606  |
| BM412710     | TC227173 |                    | floral-binding protein partial                             | -0.89543912 | 0.0342494  |
| AK326775     | TC232068 | Solyc02g086970.2.1 | aldehyde dehydrogenase family 2 member mitochondrial-like  | -0.88852836 | 0.01513849 |
| BG135747     |          |                    | uncharacterized protein                                    | -0.88468486 | 0.02660843 |
| DB708955     |          |                    | ml domain protein                                          | -0.87709475 | 0.02855956 |
| XM_004241153 | TC232880 |                    | kda class i heat shock protein                             | -0.87540881 | 0.02475616 |
| GO374372     | TC231262 |                    | stem-specific protein tsjt1-like                           | -0.86635155 | 0.00784769 |
| XM_004245975 | TC243608 | Solyc08g075150.2.1 | uncharacterized protein                                    | -0.84961806 | 0.0420314  |
| AK320618     | TC221287 |                    | ccch-type zinc finger protein                              | -0.84365961 | 0.03334823 |
| AK326818     | TC242871 | Solyc02g094400.2.1 | glycerophosphoryl diester phosphodiesterase family protein | -0.84330801 | 0.01840576 |
| GO376371     | TC240208 | Solyc12g014630.1.1 | 14 kda proline-rich protein                                | -0.84039112 | 0.02450945 |
| ES893049     | TC242246 |                    | uncharacterized protein                                    | -0.83959484 | 0.02073976 |
| AK320484     | TC225238 |                    | h-protein                                                  | -0.83957151 | 0.01840576 |
| BG128483     | TC244391 |                    | chlorophyll a b binding protein                            | -0.83816533 | 0.00550285 |
| AW648560     |          |                    | uncharacterized protein                                    | -0.82842791 | 0.00784769 |
| XM_004244821 | TC224495 |                    | pr-10 type pathogenesis-related protein                    | -0.8267964  | 0.02140228 |
| DB683275     | TC230723 |                    | light-regulated protein-like                               | -0.82572821 | 0.02503639 |
| AK247674     | TC219691 | Solyc10g080610.1.1 | f-box family protein                                       | -0.82464748 | 0.04017979 |
| AW931821     |          |                    | non-specific lipid transfer protein                        | -0.82331783 | 0.03345707 |
| AC215471     |          |                    | aldehyde dehydrogenase family 2 member mitochondrial-like  | -0.82194723 | 0.02338426 |
| AK319871     | TC219678 |                    | Drm3-like protein                                          | -0.81680886 | 0.01184266 |
| AW031075     |          |                    | chaperone protein dnaj                                     | -0.80847264 | 0.00550285 |
| DV105262     |          |                    | uncharacterized protein                                    | -0.78866265 | 0.01628872 |
| DV105087     | TC242349 |                    | glycerophosphodiester phosphodiesterase 2                  | -0.78129672 | 0.02745311 |
| NM_001247704 |          | Solyc08g005680.2.1 | undecaprenyl diphosphate synthase                          | -0.77955325 | 0.0263791  |
| AW930143     |          |                    | protein argonaute 4                                        | -0.77839126 | 0.02636752 |
| AK247797     | TC226043 |                    | uncharacterized protein                                    | -0.77425275 | 0.02245621 |
| FS203501     | TC228270 |                    | uncharacterized protein                                    | -0.76485122 | 0.02415464 |
| DV105561     | TC228136 |                    | pyridoxal phosphate phosphatase phospho2                   | -0.76281062 | 0.03089331 |
| GO374372     | TC217880 | Solyc03g006490.2.1 | stem-specific protein tsjt1-like                           | -0.76003022 | 0.01129466 |
| AK323638     | TC226071 | Solyc05g012110.2.1 | probable 6-phosphogluconolactonase 2-like                  | -0.75983439 | 0.01175905 |
| AK319618     | TC231891 |                    | protochlorophyllide reductase b                            | -0.74631066 | 0.03911017 |
| BI932339     |          | Solyc02g089170.2.1 | alpha- -glucan-protein synthase                            | -0.74552672 | 0.02891439 |
| XM_004238644 | TC224123 |                    | mlp-like protein 423                                       | -0.74546133 | 0.02368684 |
| AK320619     | TC236205 |                    | zinc finger protein                                        | -0.73966661 | 0.03021607 |
| AK319579     | TC218921 | Solyc06g069730.2.1 | chlorophyll a-b binding protein 4 precursor homolog        | -0.73634505 | 0.04602544 |
| BE436113     | TC220147 | Solyc08g066240.2.1 | histidine decarboxylase                                    | -0.73165566 | 0.01175905 |
| FJ797956     | TC236968 |                    | dehydrodolichyl diphosphate synthase 2-like                | -0.72818774 | 0.03632042 |
| GO374675     | TC238100 | Solyc08g076730.2.1 | tpr domain protein                                         | -0.72491426 | 0.02552193 |
| AI773189     | TC244923 |                    | uncharacterized protein                                    | -0.72065237 | 0.03732846 |
| AK324773     | TC233088 | Solyc06g007580.1.1 | plant-specific domain TIGR01615 family protein             | -0.71870523 | 0.01045174 |
| DB688269     | TC219692 |                    | sigma factor sigb regulation protein rsbq                  | -0.71668484 | 0.02073976 |
| AK247258     |          |                    | uncharacterized protein                                    | -0.709711   | 0.0218833  |
| XR_182712    | TC226213 |                    | flavonol sulfotransferase-like protein                     | -0.70953923 | 0.031254   |
| BT013594     |          | Solyc08g078530.2.1 | agenet domain containing protein expressed                 | -0.70036141 | 0.04714066 |



|              |          |                    |                                                             |             |            |
|--------------|----------|--------------------|-------------------------------------------------------------|-------------|------------|
| GT167409     | TC217498 | Solyc03g114560.2.1 | strictosidine synthase 1-like                               | -0.6981436  | 0.01513849 |
| EG553672     | TC231056 |                    | protease inhibitor seed storage ltp family protein          | -0.69737955 | 0.01513849 |
| GT168321     | TC230009 | Solyc03g025680.2.1 | PAR-1c protein                                              | -0.69611139 | 0.04445268 |
| GT167182     |          |                    | uncharacterized protein                                     | -0.69540847 | 0.04726932 |
| AA824781     |          | Solyc07g054280.1.1 | tryptophan decarboxylase                                    | -0.69516893 | 0.02709068 |
| XM_004250012 | TC237906 |                    | vacuolar amino acid transporter 1-like                      | -0.69349794 | 0.02540338 |
| AK325062     |          |                    | uncharacterized protein                                     | -0.69149893 | 0.04336363 |
| L19762       | TC217174 | Solyc12g009300.1.1 | sucrose synthase                                            | -0.68672895 | 0.02514321 |
| AK326479     |          | Solyc08g016310.2.1 | uncharacterized protein                                     | -0.68591836 | 0.04714066 |
| AK320566     | TC228209 |                    | basic 7s globulin 2 precursor small                         | -0.68176722 | 0.02715404 |
| CD002932     |          |                    | peptidase m50 family                                        | -0.67818289 | 0.01509349 |
| AK323217     | TC220952 | Solyc12g094380.1.1 | thioredoxin superfamily protein                             | -0.67795726 | 0.03390315 |
| DB718513     | TC237298 | Solyc12g094640.1.1 | glyceraldehyde-3-phosphate dehydrogenase                    | -0.67695664 | 0.0382606  |
| XM_006361614 | TC243575 | Solyc11g008440.1.1 | amino acid transporter                                      | -0.6766177  | 0.02844829 |
| AI776560     |          |                    | ribulose biphosphate carboxylase                            | -0.67590948 | 0.0136293  |
| BG791256     |          |                    | metallothionein-like protein                                | -0.66963998 | 0.01971002 |
| AK320213     | TC231739 |                    | uncharacterized protein                                     | -0.66630073 | 0.02533161 |
| AK325804     |          |                    | uncharacterized protein                                     | -0.66541658 | 0.02073976 |
| BP902454     | TC241679 |                    | pectin methylesterase                                       | -0.66519992 | 0.03684043 |
| AK247861     | TC218422 | Solyc02g085510.1.1 | Ovate protein                                               | -0.66484071 | 0.03820845 |
| AK247251     | TC236012 | Solyc01g109800.2.1 | uncharacterized protein                                     | -0.66480944 | 0.01823317 |
| AK319577     | TC217818 | Solyc02g063150.2.1 | ribulose biphosphate carboxylase                            | -0.65694611 | 0.01840576 |
| XM_004235374 | TC240604 | Solyc03g093370.1.1 | DYAD-like                                                   | -0.65531429 | 0.02019611 |
| FS189884     | TC229634 | Solyc07g049560.2.1 | tyrosine specific protein phosphatase family protein        | -0.6534043  | 0.01216619 |
| BG630566     | TC242392 | Solyc10g080870.2.1 | cytochrome p450                                             | -0.65299152 | 0.04070823 |
| AW738025     |          |                    | sister-chromatide cohesion protein                          | -0.65275037 | 0.01940886 |
| AW933641     |          |                    | probable 6-phosphogluconolactonase 2-like                   | -0.65231585 | 0.02509365 |
| AK323048     | TC233179 |                    | metallothionein-like protein                                | -0.6488064  | 0.02237081 |
| BE434729     |          |                    | uncharacterized protein                                     | -0.64360743 | 0.02521258 |
| ES895666     | TC226695 |                    | thaumatin-like protein                                      | -0.64340687 | 0.02736339 |
| BG125195     |          |                    | putative photosystem I subunit III precursor                | -0.64198147 | 0.0340683  |
| AK325755     | TC233034 |                    | ring u-box domain-containing protein                        | -0.64187242 | 0.02178015 |
| BI924449     |          |                    | uncharacterized protein                                     | -0.64116568 | 0.0391843  |
| AK327862     | TC238105 |                    | e3 ubiquitin-protein ligase chip                            | -0.63871554 | 0.0136293  |
| BW687249     |          |                    | pgr5-like protein 1a                                        | -0.63814253 | 0.02368684 |
| AK323938     | TC223028 |                    | uncharacterized protein                                     | -0.63729745 | 0.0220667  |
| EU057688     | TC218125 |                    | histone-lysine n-methyltransferase eza1                     | -0.63578897 | 0.0218833  |
| AW933454     |          |                    | uncharacterized protein                                     | -0.62888248 | 0.04070823 |
| AK322536     | TC237868 | Solyc06g007160.2.1 | probable nadh dehydrogenase-like                            | -0.62731911 | 0.01509349 |
| AK327947     | TC217501 |                    | maternal effect embryo arrest 14 protein                    | -0.62608114 | 0.02540922 |
| AW650793     |          |                    | psi reaction center subunit iii                             | -0.62563438 | 0.0189246  |
| BP881103     | TC241258 | Solyc06g084140.2.1 | sulfate bicarbonate oxalate exchanger and transporter sat-1 | -0.62367779 | 0.02521258 |
| XM_004243286 | TC241603 |                    | tryptophan decarboxylase                                    | -0.62364146 | 0.02545931 |
| AK323703     | TC224784 | Solyc10g078920.1.1 | thioredoxin-like protein                                    | -0.62342946 | 0.02450945 |
| BG630458     |          |                    | uncharacterized protein                                     | -0.61802041 | 0.02073976 |
| BT014213     | TC236370 |                    | homeobox-leucine zipper protein hat5                        | -0.6163161  | 0.01671469 |
| AK247326     | TC228645 |                    | high mobility group family                                  | -0.61592438 | 0.02475616 |
| BG642845     |          |                    | uncharacterized protein                                     | -0.61268978 | 0.02707424 |
| AK321215     | TC231425 | Solyc03g119200.2.1 | l-ala-d l-glu epimerase-like                                | -0.60864449 | 0.02338426 |

|              |          |                    |                                                                   |             |            |
|--------------|----------|--------------------|-------------------------------------------------------------------|-------------|------------|
| AK322333     | TC235966 |                    | 14 kda proline-rich protein                                       | -0.60810388 | 0.01513849 |
| XM_004231556 |          | Solyc02g032300.2.1 | enhancer of polycomb-like protein                                 | -0.60781971 | 0.02172422 |
| AK323321     |          |                    | uncharacterized protein                                           | -0.60655025 | 0.02909651 |
| AC209587     | TC226824 |                    | glyceraldehyde-3-phosphate dehydrogenase                          | -0.60603511 | 0.04017979 |
| GT168050     | TC229344 |                    | uncharacterized protein                                           | -0.60569089 | 0.0360622  |
| AW649285     |          | Solyc08g008020.1.1 | uncharacterized protein                                           | -0.60444565 | 0.04330572 |
| BE432867     |          |                    | uncharacterized protein                                           | -0.6014155  | 0.03732846 |
| AK326785     | TC223324 | Solyc10g007100.2.1 | mate efflux domain-containing protein                             | -0.60080932 | 0.02540338 |
| Y08804       | TC231686 | Solyc00g174340.1.1 | pathogenesis-related protein 1                                    | -0.5998738  | 0.04271415 |
| AK322366     | TC218496 |                    | osmotin-like protein                                              | -0.59897867 | 0.03914168 |
| XM_004244391 | TC236275 | Solyc08g005710.2.1 | ent-copalyl diphosphate synthase                                  | -0.59833464 | 0.04194797 |
| ES896200     |          |                    | non-specific lipid transfer protein                               | -0.5982845  | 0.031254   |
| BI933908     |          |                    | light harvesting chlorophyll a b-binding protein                  | -0.59526647 | 0.02292687 |
| AK320599     | TC219213 | Solyc06g064500.2.1 | 8-hydroxyquercetin 8-o-methyltransferase                          | -0.59500927 | 0.03859621 |
| AK324858     |          |                    | probable inactive purple acid phosphatase 28-like                 | -0.59105949 | 0.02358166 |
| AK319237     | TC234470 | Solyc02g085760.2.1 | rhomboid-related intramembrane serine protease-like protein       | -0.58856204 | 0.02836822 |
| BM409036     | TC222690 |                    | uncharacterized protein                                           | -0.58668273 | 0.04714066 |
| AK329542     | TC229907 | Solyc06g059990.2.1 | dehydrodichyl diphosphate synthase 2-like                         | -0.58505549 | 0.01824748 |
| AK329108     | TC232759 |                    | uncharacterized protein                                           | -0.58487905 | 0.01823317 |
| X98929       | TC217182 |                    | subtilisin-like protease                                          | -0.58458586 | 0.01761409 |
| AW442352     | TC240221 |                    | uncharacterized protein                                           | -0.58457825 | 0.04595807 |
| BT014054     | TC243153 |                    | uncharacterized protein                                           | -0.58266795 | 0.02049214 |
| BI926658     |          | Solyc03g058350.2.1 | translation initiation factor eif-5b                              | -0.58138511 | 0.02178015 |
| AK324033     | TC243758 | Solyc01g111170.2.1 | cyclophilin                                                       | -0.57761124 | 0.02547194 |
| AK326763     | TC243721 | Solyc09g065240.2.1 | at3g63200-like partial                                            | -0.57710222 | 0.01676436 |
| DB696245     |          |                    | uncharacterized protein                                           | -0.57688052 | 0.02521258 |
| AK322534     | TC230803 |                    | j-domain protein required for chloroplast accumulation response 1 | -0.57132875 | 0.01513849 |
| BI925751     | TC217744 |                    | uncharacterized protein                                           | -0.56915376 | 0.031254   |
| AK321350     | TC222788 |                    | uncharacterized protein                                           | -0.56847202 | 0.03120964 |
| AK322949     | TC218026 |                    | dna binding                                                       | -0.56719657 | 0.01753217 |
| AK320621     |          |                    | transmembrane fragile-x-f-associated protein                      | -0.56662957 | 0.01923585 |
| AW094172     |          |                    | ribulose biphosphate carboxylase                                  | -0.56628614 | 0.03300203 |
| BG124712     | TC229817 |                    | psbP-like protein 2                                               | -0.56507194 | 0.02556847 |
| AK247469     |          |                    | uncharacterized protein                                           | -0.56316906 | 0.02415464 |
| XM_006348946 | TC234799 |                    | inner membrane protein                                            | -0.56309715 | 0.014173   |
| BG129743     | TC224883 |                    | low affinity sulfate transporter 3-like                           | -0.56248652 | 0.03886765 |
| DB723516     |          |                    | glycerophosphodiester phosphodiesterase gde1-like isoform 1       | -0.56173156 | 0.04070823 |
| AK247342     | TC218443 |                    | nuclear transcription factor y subunit b-3                        | -0.56022621 | 0.031254   |
| BT012685     | TC222146 |                    | glyceraldehyde-3-phosphate dehydrogenase a                        | -0.55676497 | 0.02897103 |
| ES896623     | TC221302 |                    | glycine-rich protein                                              | -0.55452244 | 0.04406544 |
| XM_004232308 | TC245080 |                    | ribulose biphosphate carboxylase                                  | -0.55314255 | 0.03968271 |
| BG135910     |          |                    | light harvesting chlorophyll a b-binding protein                  | -0.55048557 | 0.01728035 |
| AK322999     | TC219426 |                    | class i chitinase                                                 | -0.548703   | 0.03483294 |
| AK247039     | TC227682 |                    | uncharacterized protein                                           | -0.54857922 | 0.02770329 |
| ES895497     | TC235884 | Solyc02g085950.2.1 | ribulose -biphosphate carboxylase oxygenase                       | -0.54825507 | 0.0402595  |
| ES894498     |          |                    | non-specific lipid transfer protein                               | -0.54806572 | 0.03204623 |
| XM_004230320 |          |                    | uncharacterized protein                                           | -0.54620389 | 0.0198878  |
| XM_006365512 | TC241071 | Solyc02g071000.1.1 | chlorophyll a b binding protein                                   | -0.54342691 | 0.02597909 |
| BI204682     | TC229657 |                    | uncharacterized protein                                           | -0.5429087  | 0.03740699 |

|              |          |                    |                                                       |             |            |
|--------------|----------|--------------------|-------------------------------------------------------|-------------|------------|
| ES893043     | TC236646 |                    | auxin response factor 2                               | -0.54246689 | 0.0340683  |
| AW442671     |          |                    | ribulose biphosphate carboxylase                      | -0.53748381 | 0.04978458 |
| AI773231     |          |                    | phosphoribulokinase precursor                         | -0.53735255 | 0.02787856 |
| ES895760     | TC220114 | Solyc02g084390.2.1 | atp binding microtubule motor family protein          | -0.5346411  | 0.01573238 |
| GO375686     | TC223298 |                    | non-specific lipid transfer protein                   | -0.53425582 | 0.04245491 |
| AK324990     |          |                    | chloroplast-targeted copper                           | -0.53204525 | 0.0402595  |
| BG133460     |          |                    | uncharacterized protein                               | -0.52880333 | 0.04645831 |
| AI782802     | TC238819 |                    | ribulose biphosphate carboxylase                      | -0.52840994 | 0.03820845 |
| AI775649     |          |                    | ribulose biphosphate carboxylase                      | -0.52793994 | 0.02521258 |
| AW648559     |          |                    | uncharacterized protein                               | -0.52792028 | 0.02660843 |
| AW930552     |          |                    | uncharacterized protein                               | -0.52711708 | 0.02521258 |
| AI774033     |          |                    | ribulose -biphosphate carboxylase oxygenase           | -0.52505314 | 0.04117608 |
| AW034476     |          |                    | uncharacterized protein                               | -0.52449334 | 0.04245491 |
| BG124604     |          |                    | uncharacterized protein                               | -0.52338005 | 0.03390315 |
| XM_004243578 |          | Solyc07g043660.2.1 | Acyl-CoA synthetase/AMP-acid ligase II                | -0.52044442 | 0.04070268 |
| AK326729     |          | Solyc01g111180.2.1 | NHL repeat-containing protein 2-like                  | -0.51898346 | 0.02207648 |
| AK324086     | TC237151 |                    | gibberellin induced protein                           | -0.51785006 | 0.04542311 |
| XM_004244682 | TC224271 | Solyc08g013670.2.1 | photosystem i reaction center subunit n               | -0.51645749 | 0.04143213 |
| BG128317     | TC238479 |                    | uncharacterized protein                               | -0.5153303  | 0.02086518 |
| BW685530     |          |                    | uncharacterized protein                               | -0.51442018 | 0.02892259 |
| XM_004251752 |          |                    | ketol-acid reductoisomerase                           | -0.51431072 | 0.04017979 |
| BT013590     |          |                    | gdp-mannose 3 -epimerase                              | -0.51373675 | 0.02767607 |
| AK319286     | TC231220 | Solyc01g100540.2.1 | PAPA-1-like conserved region family protein expressed | -0.51367541 | 0.03651629 |
| FJ190668     |          | Solyc02g081670.1.1 | double top                                            | -0.5113397  | 0.03914168 |
| XM_004241829 |          | Solyc06g063370.2.1 | chlorophyll a-b binding protein chloroplastic-like    | -0.50940405 | 0.03081024 |
| BT012706     | TC229661 |                    | protein iq-domain 14                                  | -0.5090342  | 0.02140228 |
| BG643539     |          |                    | uncharacterized protein                               | -0.50801725 | 0.02909651 |
| GT168222     |          |                    | udp-glucuronate 5-                                    | -0.50654901 | 0.03016237 |
| BW691109     |          |                    | dynammin-related protein 3a                           | -0.50516776 | 0.03576305 |
| XM_004245759 | TC235066 |                    | main allergen 15 kda oleosin                          | -0.50513879 | 0.04014828 |
| BP900647     |          |                    | chlorophyll a b binding                               | -0.50460944 | 0.02475616 |
| AK321362     | TC228761 | Solyc12g008980.1.1 | lycopene epsilon cyclase                              | -0.50427754 | 0.02475616 |
| BE460487     | TC238244 |                    | uncharacterized protein                               | -0.50220588 | 0.04661723 |
| BW686795     |          |                    | acyl- -binding domain 3                               | -0.50013427 | 0.031254   |
| AC215381     | TC227186 | Solyc02g070950.1.1 | light harvesting chlorophyll a b-binding protein      | -0.49895571 | 0.02368684 |
| AJ850958     | TC217175 |                    | alpha dioxygenase                                     | -0.49743121 | 0.04424732 |
| AW622830     |          |                    | uncharacterized protein                               | -0.49609528 | 0.04624782 |
| CD002727     | TC231267 |                    | uncharacterized protein                               | -0.49094205 | 0.02521258 |
| XM_004240326 |          | Solyc06g005710.2.1 | protein plastid transcriptionally active 16           | -0.49087832 | 0.0352324  |
| AI899395     |          |                    | uncharacterized protein                               | -0.49074583 | 0.03042268 |
| ES896520     |          |                    | non-specific lipid transfer protein                   | -0.49007618 | 0.04596287 |
| AW038831     |          |                    | uncharacterized protein                               | -0.48997616 | 0.031254   |
| DB716492     | TC229504 |                    | fzo-like protein                                      | -0.48916204 | 0.04272739 |
| AK321256     | TC229663 |                    | uncharacterized protein                               | -0.48888008 | 0.03338942 |
| BT013775     |          |                    | aspartic proteinase                                   | -0.48833426 | 0.02736339 |
| BT014515     | TC219361 | Solyc09g009940.2.1 | signal recognition particle 54 kda chloroplastic-like | -0.48689635 | 0.02621399 |
| BE344485     |          |                    | uncharacterized protein                               | -0.48671841 | 0.04143213 |
| AW223874     | TC241055 | Solyc12g070080.1.1 | glutamyl-trna amidotransferase subunit a-like         | -0.48654278 | 0.03911017 |
| DB723972     |          |                    | 60s ribosomal protein l27a                            | -0.48597339 | 0.02521258 |

|              |          |                    |                                                     |             |            |
|--------------|----------|--------------------|-----------------------------------------------------|-------------|------------|
| G0374193     | TC232512 | Solyc10g006230.2.1 | light-harvesting complex i protein lhca2            | -0.48585774 | 0.02408902 |
| AW617563     |          |                    | uncharacterized protein                             | -0.48548507 | 0.02627242 |
| AK329555     | TC231464 | Solyc08g061260.2.1 | g protein-coupled receptor                          | -0.48128895 | 0.02545931 |
| BI929256     | TC223043 |                    | ribulose biphosphate carboxylase                    | -0.48083997 | 0.0218833  |
| XM_004242943 |          |                    | uncharacterized protein                             | -0.48016746 | 0.02514321 |
| AK329878     | TC227773 |                    | uncharacterized protein                             | -0.48006563 | 0.02816051 |
| XM_004232809 | TC234451 |                    | ring finger protein                                 | -0.47872292 | 0.04085008 |
| AK328833     | TC218515 | Solyc05g014710.2.1 | remorin family protein                              | -0.47839845 | 0.03942635 |
| AF465780     | TC221750 |                    | uncharacterized protein                             | -0.47803464 | 0.03170918 |
| AK322173     | TC220437 | Solyc03g117890.2.1 | amino acid binding                                  | -0.47793674 | 0.03632042 |
| XM_004245853 | TC234297 | Solyc08g076850.2.1 | tetraspanin family protein                          | -0.47760207 | 0.03625368 |
| AK319691     | TC228859 | Solyc01g100910.2.1 | auxin-induced protein 5ng4-like                     | -0.47653025 | 0.02514321 |
| AK325562     |          |                    | isoaspartyl peptidase l-asparaginase 1 subunit beta | -0.47610199 | 0.03125374 |
| AK327849     |          |                    | f-box wd-40 repeat-containing protein               | -0.47538035 | 0.0218833  |
| X98865       | TC217870 |                    | 14-3-3 protein                                      | -0.47469424 | 0.02871289 |
| AW036071     |          |                    | uncharacterized protein                             | -0.47448931 | 0.02844829 |
| BG132416     |          |                    | uncharacterized protein                             | -0.47340439 | 0.03820904 |
| BG128157     |          |                    | light-harvesting complex ii protein lhcb3           | -0.47262916 | 0.03724721 |
| AK322603     | TC226421 | Solyc01g091700.2.1 | f-box family protein                                | -0.47243098 | 0.01923255 |
| EG553725     | TC217649 |                    | ring-h2 finger protein at180                        | -0.47048023 | 0.03004499 |
| AK323436     | TC224078 | Solyc11g040040.1.1 | phototropic-responsive nph3 family protein          | -0.4697628  | 0.03345707 |
| BP906823     |          |                    | ribulose biphosphate carboxylase                    | -0.46901351 | 0.031254   |
| BG130653     |          |                    | uncharacterized protein                             | -0.46846788 | 0.02652399 |
| DB717672     | TC237946 |                    | uncharacterized protein                             | -0.46830066 | 0.04200443 |
| AK326493     |          |                    | 3-hydroxybenzoate 6-hydroxylase                     | -0.4678975  | 0.0254915  |
| AK319516     | TC220146 | Solyc09g011810.2.1 | fructose- -biphosphatase                            | -0.46785748 | 0.03491406 |
| BG128321     |          |                    | nitrate transporter                                 | -0.46671236 | 0.02897103 |
| BI928071     |          |                    | root phototropism protein 3-like                    | -0.46600047 | 0.03880424 |
| XM_004239176 | TC237061 |                    | histidine kinase 3                                  | -0.46501954 | 0.04135763 |
| AK319766     | TC237172 |                    | microtubule associated protein type 2               | -0.46500635 | 0.02597909 |
| AK320834     | TC236491 |                    | lupeol synthase                                     | -0.46371268 | 0.02073976 |
| AI772296     | TC230256 |                    | uncharacterized protein                             | -0.46330457 | 0.03151194 |
| AW035600     | TC229506 |                    | e3 ubiquitin protein ligase rie1-like               | -0.46250989 | 0.02533161 |
| XM_004247306 |          |                    | frigida-like protein                                | -0.46226998 | 0.031254   |
| AJ785331     | TC236561 |                    | uncharacterized protein                             | -0.46201234 | 0.03995041 |
| AW018272     |          |                    | uncharacterized protein                             | -0.46135207 | 0.0218833  |
| BP890621     | TC239804 |                    | sterol regulatory element-binding protein site 2    | -0.46125197 | 0.03151194 |
| AK327821     | TC236361 |                    | uncharacterized protein                             | -0.46085289 | 0.04442187 |
| AK322785     |          | Solyc10g078250.1.1 | 70 kda peptidyl-prolyl isomerase-like               | -0.45969732 | 0.031254   |
| AK325708     |          | Solyc12g013820.1.1 | ubiquitin conjugating                               | -0.45962146 | 0.0479172  |
| BG628024     |          |                    | mads box                                            | -0.4593363  | 0.0352324  |
| XM_004235486 |          |                    | kda class iii heat shock protein                    | -0.45808885 | 0.02521258 |
| AK321277     | TC237348 |                    | uncharacterized protein                             | -0.45746716 | 0.02545931 |
| AK320607     |          |                    | TCP transcription factor 10                         | -0.45634537 | 0.0261954  |
| AK321738     |          |                    | uncharacterized protein                             | -0.45603168 | 0.031254   |
| AK319572     | TC236705 |                    | light harvesting chlorophyll a b-binding protein    | -0.45442207 | 0.03290719 |
| AK247762     | TC239151 | Solyc01g107410.2.1 | homeobox protein                                    | -0.45440221 | 0.03510861 |
| BP906232     |          |                    | chlorophyll a b binding protein                     | -0.45282303 | 0.02668256 |
| AB211523     | TC226321 | Solyc08g075370.2.1 | uncharacterized protein                             | -0.45241737 | 0.03968076 |

|              |          |                    |                                                                       |             |            |
|--------------|----------|--------------------|-----------------------------------------------------------------------|-------------|------------|
| BI206370     |          |                    | inorganic phosphate                                                   | -0.45130768 | 0.02892259 |
| AK324212     | TC227217 | Solyc05g026490.2.1 | phosphoglucomutase phosphomannomutase family protein                  | -0.45115439 | 0.02736339 |
| AK247873     | TC219487 |                    | uncharacterized protein                                               | -0.45078021 | 0.04014828 |
| AK247727     | TC221999 |                    | uncharacterized protein                                               | -0.45069758 | 0.04830283 |
| BI210411     |          |                    | uncharacterized protein                                               | -0.45022326 | 0.03968076 |
| FS192950     |          |                    | uncharacterized protein                                               | -0.44998719 | 0.04473519 |
| AK327731     | TC237134 | Solyc09g082130.2.1 | uncharacterized protein                                               | -0.44940488 | 0.02409877 |
| GO374183     | TC222405 | Solyc09g082780.2.1 | uncharacterized protein                                               | -0.44924285 | 0.0340683  |
| BI927471     |          |                    | 1-phosphatidylinositol phosphodiesterase-related protein              | -0.44912911 | 0.02338954 |
| AC244940     | TC224050 |                    | atpase subunit 1                                                      | -0.44896024 | 0.04645831 |
| XM_004234318 |          | Solyc03g026120.2.1 | probable methyltransferase pmt15-like                                 | -0.44851226 | 0.0376923  |
| BF097890     |          |                    | uncharacterized protein                                               | -0.44759447 | 0.022386   |
| BM412815     |          |                    | dna mismatch repair protein muts                                      | -0.4465273  | 0.04661723 |
| BI423119     |          |                    | cytochrome p450 like protein                                          | -0.4460411  | 0.03958396 |
| GO373180     | TC236299 | Solyc01g073680.2.1 | protease inhibitor seed storage lipid transfer protein family protein | -0.44582252 | 0.0340683  |
| BG628285     |          |                    | e3 ubiquitin-protein ligase sinat5                                    | -0.44510836 | 0.03911017 |
| NM_001279015 |          | Solyc02g070390.2.1 | plastid transcriptionally active 12                                   | -0.44494538 | 0.03273039 |
| AK319761     | TC235921 |                    | short-chain dehydrogenase reductase family protein                    | -0.44461809 | 0.0378867  |
| XM_004238811 |          |                    | abc transporter g family member 7                                     | -0.44443938 | 0.0250884  |
| BW687239     | TC241571 |                    | uncharacterized protein                                               | -0.44428009 | 0.03172394 |
| AK327428     | TC232738 |                    | uncharacterized protein                                               | -0.44253749 | 0.03553866 |
| AK320413     | TC229082 |                    | uncharacterized protein                                               | -0.44194799 | 0.03657075 |
| FS191440     |          |                    | atp binding                                                           | -0.44191128 | 0.03210871 |
| AK224678     | TC231354 |                    | hydrophobic protein lti6a                                             | -0.44187525 | 0.03765038 |
| AK328815     | TC241598 |                    | early-responsive to dehydration                                       | -0.44185391 | 0.02871289 |
| AK321419     | TC218178 | Solyc00g136260.1.1 | e3 ubiquitin-protein ligase atl23-like                                | -0.441303   | 0.03595597 |
| BI927119     |          |                    | uncharacterized protein                                               | -0.43992708 | 0.03423685 |
| BI206991     |          |                    | uncharacterized protein                                               | -0.43941905 | 0.02715404 |
| AF123258     | NP000065 |                    | heat-induced chilling tolerance protein HCT6                          | -0.43928542 | 0.02540338 |
| XM_004232987 | TC244740 |                    | trehalose-6-phosphate synthase                                        | -0.43923795 | 0.03503395 |
| BI209696     |          |                    | class i chitinase                                                     | -0.43869877 | 0.03886765 |
| BT014222     | TC237658 |                    | pyruvate orthophosphate dikinase regulatory protein                   | -0.43852502 | 0.04200443 |
| XM_004245887 | TC228474 |                    | phosphoribulokinase precursor                                         | -0.43828333 | 0.0391843  |
| XM_004235250 | TC240274 |                    | atp binding                                                           | -0.43812161 | 0.03769225 |
| XM_004249865 | TC238533 | Solyc11g006060.1.1 | uncharacterized protein                                               | -0.43804212 | 0.02787856 |
| AW033803     |          |                    | pathogenesis-related protein 10                                       | -0.43763446 | 0.03927478 |
| BT013143     | TC228153 |                    | atp synthase cf1 alpha subunit                                        | -0.43608537 | 0.04830703 |
| AW034904     | TC239912 | Solyc12g014150.1.1 | uncharacterized protein                                               | -0.4359431  | 0.0472788  |
| DQ340254     | TC217165 |                    | auxin response factor 3                                               | -0.43586253 | 0.03657075 |
| BT013246     | TC240076 |                    | elongation factor-1 alpha                                             | -0.43493662 | 0.03204623 |
| AK320203     | TC243241 |                    | uncharacterized protein                                               | -0.43296025 | 0.03760724 |
| BT013695     |          |                    | arginine serine-rich splicing                                         | -0.43246425 | 0.04014828 |
| XM_004233047 |          | Solyc02g071010.1.1 | light harvesting chlorophyll a b-binding protein                      | -0.43166183 | 0.03345707 |
| BI931815     |          |                    | dna binding                                                           | -0.43132367 | 0.04232291 |
| AK320892     | TC218446 |                    | uncharacterized protein                                               | -0.43099541 | 0.03989641 |
| BM408913     | TC237493 |                    | protein argonaute 4                                                   | -0.43075929 | 0.04070823 |
| AK325149     | TC234962 | Solyc09g075390.2.1 | uncharacterized protein                                               | -0.43032828 | 0.02627242 |
| AK324619     | TC218869 |                    | heavy metal transport detoxification domain-containing protein        | -0.43013914 | 0.0488478  |
| AK330003     | TC231697 | Solyc11g012590.1.1 | uncharacterized protein                                               | -0.42995154 | 0.03042268 |

|              |          |                    |                                                            |             |            |
|--------------|----------|--------------------|------------------------------------------------------------|-------------|------------|
| AK321930     | TC233612 |                    | chlorophyll a b-binding protein                            | -0.42904446 | 0.0376923  |
| AK326403     | TC242653 |                    | plastid transcriptionally active 12                        | -0.42815348 | 0.04451332 |
| XM_004240345 | TC242099 |                    | atp-dependent zinc metalloprotease ftsh chloroplastic-like | -0.42797267 | 0.04470643 |
| G0375405     |          |                    | uncharacterized protein                                    | -0.42772782 | 0.03215241 |
| BP891849     |          |                    | uncharacterized protein                                    | -0.42714985 | 0.02897103 |
| BG130624     |          |                    | serine threonine-protein phosphatase bsl2                  | -0.42552507 | 0.02621399 |
| AI773206     |          |                    | light harvesting chlorophyll a b-binding protein           | -0.42532209 | 0.04629541 |
| AW617458     |          |                    | serine carboxypeptidase-like protein                       | -0.42436453 | 0.0382606  |
| BG130134     | TC237159 |                    | uncharacterized protein                                    | -0.423784   | 0.04709    |
| XM_004234193 | TC234626 | Solyc03g005780.1.1 | light harvesting chlorophyll a b-binding protein           | -0.42375687 | 0.03718096 |
| AK319705     |          | Solyc09g090090.1.1 | phosphoenolpyruvate carboxylase kinase                     | -0.42255878 | 0.04288534 |
| AF328786     | TC222118 |                    | protein ethylene insensitive 3-like                        | -0.42192661 | 0.04830703 |
| AK321736     | TC245156 | Solyc03g112760.2.1 | uncharacterized protein                                    | -0.42157613 | 0.03522503 |
| XM_004234925 | TC239905 |                    | uncharacterized protein                                    | -0.42154705 | 0.0340683  |
| XM_004238409 | TC238116 | Solyc04g082740.2.1 | heat shock protein-like protein                            | -0.42001466 | 0.03657075 |
| BT012911     |          |                    | ring-h2 finger protein at17-like                           | -0.41940483 | 0.04399253 |
| AM050814     | TC239505 | Solyc01g028810.2.1 | tcp-1 cpn60 chaperonin family protein                      | -0.41868354 | 0.02736339 |
| BP908913     |          | Solyc09g065160.2.1 | fzo-like protein                                           | -0.4185662  | 0.04992153 |
| XM_004249411 |          |                    | dna glycosylase                                            | -0.41742541 | 0.04245491 |
| AW650716     |          | Solyc03g118630.2.1 | uncharacterized protein                                    | -0.41725405 | 0.031254   |
| AI896197     |          | Solyc11g069990.1.1 | disease resistance protein r3                              | -0.41656994 | 0.04531512 |
| AK319463     | TC227724 |                    | phosphate triose-phosphate translocator precursor          | -0.41615992 | 0.04645831 |
| FS191030     |          |                    | homeodomain leucine zipper protein                         | -0.41596677 | 0.0382954  |
| GT167532     |          |                    | uncharacterized protein                                    | -0.41592774 | 0.04714066 |
| CD003544     | TC217553 |                    | hydroxyproline-rich glycoprotein family protein            | -0.41581256 | 0.04272739 |
| XM_004233698 | TC232324 |                    | f-box family protein                                       | -0.41556722 | 0.031254   |
| BG131937     |          |                    | uncharacterized protein                                    | -0.41554429 | 0.04846895 |
| BP895733     |          |                    | translationally controlled tumor protein                   | -0.41516191 | 0.04256384 |
| AK319473     | TC219455 |                    | ribosomal protein s1                                       | -0.41478962 | 0.03549013 |
| AW093555     |          |                    | sulfate transporter                                        | -0.41365425 | 0.0382606  |
| AK319307     | TC236916 |                    | uncharacterized protein                                    | -0.41354593 | 0.0320517  |
| AB359913     | TC231470 | Solyc03g098240.2.1 | glutamate decarboxylase                                    | -0.41222109 | 0.030454   |
| AK325085     | TC240978 | Solyc08g062960.2.1 | heat stress transcription factor a-2                       | -0.41216608 | 0.02787856 |
| BI421163     |          |                    | uncharacterized protein                                    | -0.40951484 | 0.04522901 |
| AF347613     | TC217189 |                    | sulfate transporter                                        | -0.40926666 | 0.04844452 |
| BF113448     |          |                    | uncharacterized protein                                    | -0.40878115 | 0.04792261 |
| BG127006     |          |                    | disease resistance protein                                 | -0.4087583  | 0.04844452 |
| AJ785173     |          |                    | glycerol-3-phosphate dehydrogenase                         | -0.4076574  | 0.03561419 |
| AK324791     | TC228696 |                    | zeaxanthin epoxidase                                       | -0.40698549 | 0.03859621 |
| BG129795     | TC237419 |                    | two-component response regulator arr11                     | -0.4068722  | 0.04715727 |
| BF097763     |          |                    | auxin response factor 8                                    | -0.40658858 | 0.03880424 |
| AK319378     | TC235350 | Solyc09g065300.2.1 | uncharacterized protein                                    | -0.40645651 | 0.0320517  |
| CD002105     | TC231816 |                    | uncharacterized protein                                    | -0.40620179 | 0.03446809 |
| AF154420     | TC236199 |                    | beta galactosidase 9                                       | -0.4058883  | 0.03510861 |
| AK326004     | TC242548 |                    | transcription factor apetala2                              | -0.4049301  | 0.04714066 |
| AI896069     |          |                    | uncharacterized protein                                    | -0.40451997 | 0.03814159 |
| BE354262     | TC240213 |                    | udp-glucose pyrophosphorylase                              | -0.40451867 | 0.03962397 |
| BI930115     | TC223942 |                    | short-chain dehydrogenase reductase                        | -0.4032678  | 0.03914168 |
| AK322281     |          |                    | somatic embryogenesis receptor kinase                      | -0.40298293 | 0.04897428 |

|              |          |                    |                                                                |             |            |
|--------------|----------|--------------------|----------------------------------------------------------------|-------------|------------|
| BP887076     |          |                    | uncharacterized protein                                        | -0.40295065 | 0.04406544 |
| FS181976     |          |                    | uncharacterized protein                                        | -0.40220939 | 0.0340683  |
| AI898968     |          |                    | uncharacterized protein                                        | -0.40179897 | 0.0488478  |
| AB217916     | TC217195 |                    | atp-dependent zinc metalloprotease ftsh chloroplastic-like     | -0.40153466 | 0.04830117 |
| XM_004230269 | TC240432 | Solyc01g100650.2.1 | haloacid dehalogenase-like hydrolase domain-containing protein | -0.40144758 | 0.04709191 |
| BG134006     | TC236508 | Solyc07g064240.2.1 | early nodulin-like protein                                     | -0.4006306  | 0.02966005 |
| XM_004230865 | TC239798 |                    | btb poz domain-containing protein at1g63850-like               | -0.40048461 | 0.031254   |
| AK328294     | TC225616 | Solyc03g033470.2.1 | s-adenosyl-l-methionine-dependent methyltransferase domain     | -0.39953221 | 0.0434884  |
| EU021291     | TC217143 |                    | phototropin 2                                                  | -0.39924613 | 0.04123466 |
| XM_004244139 |          | Solyc07g063600.2.1 | light-harvesting complex ii protein lhcb3                      | -0.39831134 | 0.03657075 |
| BG643643     |          |                    | rna recognition motif-containing protein                       | -0.39796901 | 0.04360618 |
| BP893974     |          |                    | uncharacterized protein                                        | -0.39795055 | 0.03462098 |
| AK329678     |          |                    | scp1-like small phosphatase 4b                                 | -0.39622734 | 0.04758507 |
| AK319457     | TC239187 | Solyc09g090980.2.1 | pathogenesis-related protein 10                                | -0.39602565 | 0.04349858 |
| BI206344     |          |                    | uncharacterized protein                                        | -0.39577482 | 0.04467306 |
| AK323753     | TC217272 | Solyc07g007120.2.1 | homeobox protein knotted-1-like 3-like                         | -0.39524228 | 0.02897103 |
| AW220421     | TC235729 |                    | uncharacterized protein                                        | -0.39348575 | 0.04657067 |
| ES894678     | TC240089 |                    | uncharacterized protein                                        | -0.39325865 | 0.03820904 |
| AW216853     |          |                    | uncharacterized protein                                        | -0.39289672 | 0.04216354 |
| AK322751     | TC224049 | Solyc03g096850.2.1 | rubredoxin family protein                                      | -0.39283767 | 0.03880424 |
| BP908405     | TC245084 | Solyc09g091280.2.1 | retinoblastoma-related protein 1                               | -0.39163123 | 0.03914168 |
| BM409920     | TC233283 |                    | uncharacterized protein                                        | -0.39121594 | 0.0496776  |
| AK328345     | TC225010 | Solyc06g084610.2.1 | uncharacterized protein                                        | -0.39068405 | 0.03632042 |
| DV103721     |          | Solyc01g005210.2.1 | uncharacterized protein                                        | -0.39036823 | 0.04245151 |
| BP895153     |          |                    | pumilio-family rna-binding domain-containing protein           | -0.39026183 | 0.04117608 |
| AK328263     | TC240545 | Solyc06g073920.2.1 | axial regulator yabby 2                                        | -0.3899815  | 0.03968076 |
| AK319582     | TC244442 |                    | 33kda precursor protein of oxygen-evolving complex             | -0.38968872 | 0.031254   |
| AK246970     | TC229232 |                    | uncharacterized protein                                        | -0.38894408 | 0.03765038 |
| AK328745     | TC222228 |                    | 60s ribosomal protein                                          | -0.38874019 | 0.0488478  |
| AK319439     | TC240183 |                    | senescence-associated protein-related                          | -0.38783547 | 0.03859621 |
| BI422970     | TC232414 |                    | histidine decarboxylase                                        | -0.38750149 | 0.03491406 |
| BG628760     | TC245192 |                    | nadph-dependent codeinone reductase-like protein               | -0.38728431 | 0.0402595  |
| BI204027     | TC239835 |                    | sigma factor sigb regulation protein rsbq                      | -0.38682971 | 0.04531512 |
| BI930949     | TC241421 |                    | uncharacterized protein                                        | -0.38632609 | 0.0352324  |
| AK327177     |          | Solyc06g082320.2.1 | uncharacterized protein                                        | -0.38620016 | 0.03792816 |
| AK320462     | TC228683 | Solyc12g099200.1.1 | invertase inhibitor                                            | -0.38552757 | 0.03765038 |
| BI928621     |          |                    | chlorophyll a-b binding protein 4 precursor homolog            | -0.38544902 | 0.04456631 |
| XM_004250482 | TC239035 | Solyc11g011150.1.1 | xeroderma pigmentosum group c-complementing protein            | -0.38536229 | 0.03911328 |
| CN641290     |          |                    | serine threonine-protein kinase-like protein ccr3-like         | -0.38500889 | 0.04661723 |
| AK324092     | TC226189 | Solyc03g117490.2.1 | glycerol kinase                                                | -0.38346084 | 0.03513792 |
| AK324500     | TC235459 | Solyc08g005560.2.1 | binding protein                                                | -0.38316153 | 0.04017979 |
| AK319524     | TC234432 | Solyc03g115900.2.1 | chlorophyll a-b binding protein 4 precursor homolog            | -0.3829534  | 0.04915587 |
| AM261867     | TC223056 | Solyc01g098190.2.1 | na+ h+ antiporter                                              | -0.38286305 | 0.0336655  |
| AI896924     |          |                    | beta- -galactosyltransferase sqv-                              | -0.38249777 | 0.03510861 |
| BG129762     |          |                    | uncharacterized protein                                        | -0.38149186 | 0.04336363 |
| AW039683     |          |                    | uncharacterized protein                                        | -0.38141013 | 0.0382606  |
| BI207577     |          |                    | retrotransposon ty3-gypsy subclass                             | -0.38137528 | 0.03880424 |
| BP898990     | TC233544 |                    | uncharacterized protein                                        | -0.38136323 | 0.0402219  |
| AK328366     |          |                    | plastidic glucose transporter 3                                | -0.38062703 | 0.04014828 |

|              |          |                    |                                                          |             |            |
|--------------|----------|--------------------|----------------------------------------------------------|-------------|------------|
| AK323916     | TC226471 | Solyc03g026210.2.1 | dihydrodipicolinate reductase                            | -0.37982891 | 0.04399253 |
| AK323427     | TC243508 |                    | alpha tubulin 1                                          | -0.37921431 | 0.03592504 |
| AW933656     |          |                    | uncharacterized protein                                  | -0.37898215 | 0.04945286 |
| BG124383     |          |                    | 16kda membrane protein                                   | -0.37876605 | 0.04419626 |
| BG626855     |          |                    | uncharacterized protein                                  | -0.37835569 | 0.03880424 |
| AW038953     | TC241878 |                    | uncharacterized protein                                  | -0.37823393 | 0.04312736 |
| XM_004237772 | TC220387 | Solyc04g071800.2.1 | flavonoid 3-                                             | -0.37779974 | 0.04601091 |
| AK322637     | TC241561 |                    | cysteine desulfurase                                     | -0.37747996 | 0.03914168 |
| AW930124     |          | Solyc07g017590.1.1 | uncharacterized protein                                  | -0.37704337 | 0.04836019 |
| AK319386     | TC219667 | Solyc03g063240.2.1 | root border cell-specific protein                        | -0.37676559 | 0.03820845 |
| BG627026     |          |                    | protein acclimation of photosynthesis to environment     | -0.37674662 | 0.03733858 |
| AK320049     | TC235633 | Solyc03g005000.2.1 | uncharacterized protein                                  | -0.37643972 | 0.04200443 |
| GO372806     | TC220807 |                    | aspartic proteinase nepenthesin-1                        | -0.37627801 | 0.04070823 |
| AK319592     | TC223560 |                    | light-harvesting complex ii protein lhcb6                | -0.37580588 | 0.03968076 |
| BP906338     |          |                    | ribulose biphosphate carboxylase                         | -0.37519236 | 0.04802333 |
| AK327854     |          |                    | Ubiquitin-activating enzyme E1 domain-containing protein | -0.37403642 | 0.04830283 |
| GO374202     | TC223042 |                    | 4-hydroxyphenylpyruvate dioxygenase                      | -0.37389507 | 0.04919222 |
| BI931968     |          |                    | chlorophyll a-b binding protein 4 precursor homolog      | -0.37371146 | 0.03334823 |
| AW648263     |          |                    | chlorophyll a-b binding protein 4 precursor homolog      | -0.3733288  | 0.03769225 |
| BT014577     | TC218324 |                    | delta-1-pyrroline-5-carboxylate dehydrogenase 1 protein  | -0.37211595 | 0.03880424 |
| BI921917     | TC244507 |                    | tubby protein                                            | -0.37165526 | 0.03749231 |
| BP893679     |          |                    | uncharacterized protein                                  | -0.37165481 | 0.04353835 |
| AK329490     | TC226219 |                    | methyladenine glycosylase family protein                 | -0.37154972 | 0.0352324  |
| AK327227     |          |                    | uncharacterized protein                                  | -0.37111966 | 0.04742101 |
| AK247952     | TC239993 |                    | retroelement pol polyprotein                             | -0.37092485 | 0.04725003 |
| XM_004234340 |          | Solyc03g025880.2.1 | cleavage and polyadenylation specificity factor 5        | -0.37090677 | 0.04179186 |
| DB682391     | TC224489 | Solyc07g007020.2.1 | wall-associated receptor kinase 2-like                   | -0.37085625 | 0.0402595  |
| AK325402     | TC237801 |                    | heat stress transcription factor a-1                     | -0.36881892 | 0.04542311 |
| AK321969     | TC244131 | Solyc07g043160.1.1 | lignan glucosyltransferase                               | -0.36388098 | 0.04522901 |
| AK320475     |          |                    | gtp cyclohydrolase ii                                    | -0.36353683 | 0.0394046  |
| AK326247     | TC224781 | Solyc10g085810.1.1 | uncharacterized protein                                  | -0.36345083 | 0.03893604 |
| AW617395     |          |                    | uncharacterized protein                                  | -0.36269424 | 0.04530457 |
| AW036157     |          |                    | thioredoxin h2                                           | -0.3625621  | 0.03418529 |
| AK326627     | TC231580 |                    | RHF2A1; protein binding / zinc ion binding               | -0.36219392 | 0.04470643 |
| BF098222     |          |                    | uncharacterized protein                                  | -0.36201487 | 0.03968271 |
| BG128633     |          |                    | 33kda precursor protein of oxygen-evolving complex       | -0.36191071 | 0.03780872 |
| BT013631     |          |                    | protein iq-domain 31-like                                | -0.36158081 | 0.03859621 |
| AK321267     | TC240838 |                    | blue copper protein                                      | -0.36072063 | 0.04704155 |
| AI775975     |          |                    | stem-specific protein                                    | -0.36047303 | 0.04017979 |
| BI421716     | TC234011 | Solyc12g099700.1.1 | Lipoyl synthase                                          | -0.36015105 | 0.04968022 |
| GT168598     | TC242000 | Solyc06g082940.2.1 | photosystem i reaction center subunit xi                 | -0.35936505 | 0.0479172  |
| AK325633     | TC220517 | Solyc05g008920.2.1 | uncharacterized protein                                  | -0.35934    | 0.04017979 |
| AK328037     | TC232787 |                    | trx fold-containing protein                              | -0.35932182 | 0.04496274 |
| CD002305     | TC243233 |                    | uncharacterized protein                                  | -0.35874777 | 0.04135763 |
| XM_004240123 | TC217646 |                    | 4-hydroxyphenylpyruvate dioxygenase                      | -0.35854252 | 0.0433385  |
| BI935751     | TC225009 |                    | gag and pol identical                                    | -0.35835858 | 0.04844452 |
| DB701784     | TC245234 |                    | uncharacterized protein                                  | -0.3582213  | 0.04683372 |
| BW687846     | TC231814 | Solyc11g072540.1.1 | transducin wd40 domain-containing protein                | -0.35734276 | 0.03914168 |
| AK321201     | TC226908 | Solyc06g083420.1.1 | uncharacterized protein                                  | -0.35648635 | 0.04864346 |



|              |          |                    |                                                              |             |            |
|--------------|----------|--------------------|--------------------------------------------------------------|-------------|------------|
| BI928326     |          |                    | uncharacterized protein                                      | -0.35315864 | 0.04897428 |
| BM411005     |          |                    | uncharacterized protein                                      | -0.35303157 | 0.04624782 |
| AW223023     |          |                    | eukaryotic translation initiation factor 5b                  | -0.35250606 | 0.04714066 |
| AK247769     |          |                    | uncharacterized protein                                      | -0.35248599 | 0.04830703 |
| BP897648     |          |                    | light-harvesting complex i chlorophyll a b binding protein 1 | -0.35171627 | 0.04288534 |
| AW932557     | TC235636 | Solyc03g095310.2.1 | cytochrome p450                                              | -0.35062425 | 0.04830283 |
| DB708884     | TC232014 | Solyc06g065490.2.1 | domain-containing protein                                    | -0.3499393  | 0.04830283 |
| CK715512     |          |                    | histone-lysine n- h3 lysine-9 specific suvh9                 | -0.34968244 | 0.03880424 |
| BE450133     |          |                    | uncharacterized protein                                      | -0.34935579 | 0.04802333 |
| DB679602     | TC239043 | Solyc10g047130.1.1 | rna recognition motif family expressed                       | -0.34913342 | 0.04968022 |
| AK246319     |          |                    | thylakoid lumen kda protein                                  | -0.34887865 | 0.04297324 |
| AK320448     | TC221090 | Solyc03g121920.2.1 | solute carrier family 25 member 44-like                      | -0.3487462  | 0.03880424 |
| AK320831     | TC238528 |                    | hxxx-d-type acyl-transferase-like protein                    | -0.34741745 | 0.03886765 |
| U83708       | TC241686 |                    | farnesyltransferase beta subunit                             | -0.34736916 | 0.04530457 |
| BI929455     | TC235551 |                    | uncharacterized protein                                      | -0.34723606 | 0.04897428 |
| BI207919     |          |                    | lim domain-containing protein                                | -0.34568888 | 0.0391856  |
| AK320157     |          |                    | translation initiation factor if-3                           | -0.34559312 | 0.04017979 |
| DB684193     | TC236660 |                    | thioredoxin m4                                               | -0.34384387 | 0.04092675 |
| AK322836     |          |                    | gtp-binding protein                                          | -0.34270362 | 0.04344963 |
| DB720036     | TC241530 |                    | uncharacterized protein                                      | -0.3404077  | 0.04531512 |
| AW037578     |          | Solyc06g034120.2.1 | quinone oxidoreductase                                       | -0.33914509 | 0.04046689 |
| AI484567     |          |                    | uncharacterized protein                                      | -0.33793004 | 0.04929429 |
| AW616828     |          |                    | uncharacterized protein                                      | -0.33771389 | 0.04650693 |
| XM_004234432 | TC221437 |                    | at4g04770 t4b21_16                                           | -0.33623244 | 0.04130896 |
| AJ831881     |          |                    | 23s ribosomal rna                                            | -0.33581857 | 0.04802605 |
| FS200032     |          |                    | glutamate binding protein                                    | -0.33371561 | 0.04915587 |
| AK323146     | TC218899 |                    | uncharacterized protein                                      | -0.3323939  | 0.04542311 |
| BM413605     |          |                    | Nuclear transcription factor Y subunit A-3                   | -0.3323296  | 0.04213426 |
| BP881200     |          |                    | uncharacterized protein                                      | -0.33177889 | 0.0433385  |
| DB717269     |          |                    | atp synthase subunit                                         | -0.32774916 | 0.04798909 |
| XM_004235672 |          | Solyc03g120000.2.1 | RING finger protein                                          | -0.32380254 | 0.04897428 |
| BI422737     | TC242220 |                    | uncharacterized protein                                      | -0.32268687 | 0.04424732 |
| AK247192     | TC230419 |                    | cyclin-dependent kinase f-4-like                             | -0.31723751 | 0.04728321 |
| AJ784533     |          |                    | uncharacterized protein                                      | -0.31182591 | 0.04984299 |

**Supplementary Table S3.** Primer sequences used for Anchor-PCR, Genotyping, and qRT-PCR analysis

| A. Primers used for Anchor-PCR analysis |                |                          |
|-----------------------------------------|----------------|--------------------------|
|                                         | Primer name    | Primer sequence (5'-3')  |
|                                         | Adaptor-1      | CTAATACGACTCACTATAGGC    |
|                                         | Adaptor-2      | CTATAGGGCTCGAGCGGC       |
|                                         | Adaptor-3      | AGCGGCGGGGAGGT           |
|                                         | Anchor-Right-1 | CAGACGCCTTGGTTAGGTTG     |
|                                         | Anchor-Right-2 | GTTCCCCTTCTGGAAGATCG     |
|                                         | Anchor-Right-3 | GGGTGTTCTGTCTGTCGTT      |
|                                         | Anchor-Left-1  | CAAAGGCAACCAAACAACA      |
|                                         | Anchor-Left-2  | GCGTAGTGACCCGACAAATAA    |
|                                         | Anchor-Left-3  | AATTATGCTCAAACATTTCCATGA |
| B. Primers used for Genotyping analysis |                |                          |
|                                         | Primer name    | Primer sequence (5'-3')  |
|                                         | Genotyping-F   | TGGCCAAAACACTTCAATTC     |
|                                         | Genotyping-R   | TCAACCAATCAAACCTCGACA    |
|                                         | T-DNA-R        | GGCAACCAAACAACAAATGA     |
| C. Primers used for qRT-PCR analysis    |                |                          |
| Gene locus identity <sup>a</sup>        | Primer name    | Primer sequence (5'-3')  |
| Solyc01g056940.2.1                      | S01g056940-F   | CCAAGATCCAGGACAAGGAA     |
|                                         | S01g056940-R   | AAATCAAACGCTGCTGGTCT     |
| Solyc02g078150.2.1                      | S02g078150-F   | TGCCGCAACTGTCTTATGAA     |
|                                         | S02g078150-R   | CCGGTGAGCTTTTCCATTTA     |
| Solyc02g081670.1.1                      | S02g081670-F   | TACCTCCTTGTCCATTTTTG     |
|                                         | S02g081670-R   | AACTCTCCCCCTCCAACCTC     |
| Solyc03g119370.1.1                      | S03g119370-F   | ACCTGGAAGAACGGACAATG     |
|                                         | S03g119370-R   | GAGGCGTTGATGACTGTGAA     |
| Solyc05g012020.2.1                      | S05g012020-F   | AACATCATGGCATTGTGGTG     |
|                                         | S05g012020-R   | TGTTGATGGTGCTGCATTTT     |
| Solyc05g015750.2.1                      | S05g015750-F   | TTCATTGCGATATGGTAACCT    |
|                                         | S05g015750-R   | CATCCAACGTGAACCTAGACGA   |
| Solyc05g056620.1.1                      | S05g056620-F   | TCTCTGAAGTGCAGAAAAAGGA   |
|                                         | S05g056620-R   | TAGTTTGCTGGTGCCATTCA     |
| Solyc06g007180.2.1                      | S06g007180-F   | GAGCCTGACAGTTCCTGGAG     |
|                                         | S06g007180-R   | TAGCAGCCCTACCAGAAGGA     |
| Solyc06g007580.1.1                      | S06g007580-F   | ACACCGTTTCATGCAAAAACA    |
|                                         | S06g007580-R   | GCCTGATTTCGATGGAGGTAA    |
| Solyc06g068500.2.1                      | S06g068500-F   | ACGGCTATGGGAATGATGAG     |
|                                         | S06g068500-R   | GTCTTTTTGTTTGC GCGATT    |
| Solyc06g082030.2.1                      | S06g082030-F   | CAAACGCACAGCTCCAATAA     |
|                                         | S06g082030-R   | GCATGTTCTTCAATTTGGTTCA   |
| Solyc08g006740.2.1                      | S08g006740-F   | TCTTCAGCAAGCAGGAATCA     |
|                                         | S08g006740-R   | ATAATTGCCAACGACGAACG     |
| Solyc10g076740.1.1                      | S10g076740-F   | AACAGCAGAAGCAAGCAAAG     |
|                                         | S10g076740-R   | CCAAGTCCAAATCAGCAACA     |
| Solyc12g006380.1.1                      | S12g006380-F   | TCTCAAAGAAATGGGATGTGC    |
|                                         | S12g006380-R   | TTGCAATTTCTGGTTGTGGA     |
| Solyc12g036390.1.1                      | S12g036390-F   | CATGCAAAAACCTGTGAGATGG   |
|                                         | S12g036390-R   | GAAGGCATTCTCACCAAAT      |
| Solyc12g098590.1.1                      | S12g098590-F   | TGGACCGATCAAATGACAAA     |
|                                         | S12g098590-R   | CCTTTTACCCCTCCATCCAT     |

<sup>a</sup> Gene locus identity based on ITAG release 2.4 official annotations on the SL2.50 genome build by the International Tomato Annotation Group (ITAG). The SOL Genomics Network (SGN) <http://solgenomics.net/>
